# Supplementary material for: Solar-to-hydrogen peroxide conversion of photocatalytic carbon dots with anthraquinone: Unveiling the dual role of surface functionalities
Source: Research Square preprint supplement (doi:10.21203/rs.3.rs-109684/v1), 2020-12-02
Supplement: Supplementary file 1 [file 85c5631ce6dcc640e587fc87.docx]

Solar-to-hydrogen peroxide conversion of photocatalytic carbon dots with anthraquinone: Unveiling the dual role of surface functionalities

*Minsu Gu,1† Do-Yeon Lee, 2† Jinhong Mun,3 Dongseok Kim,1 Hae-in Cho,2 Geunsik Lee,3 Byeong-Su Kim,1* and Hyoung-il Kim2**

1Department of Chemistry and 1Department of Civil & Environmental Engineering,

Yonsei University, 50 Yonsei-ro, Seoul 03722, Republic of Korea

3Department of Chemistry, Ulsan National Institute of Science and Technology (UNIST), 50 UNIST-gil, Ulsan 44919, Republic of Korea

†These authors contributed equally to this work.

E-mail: bskim19@yonsei.ac.kr (B.-S.K.); hi.kim@yonsei.ac.kr (H.-i.K.)

**Table 1.** Photocatalytic H2O2 formation yields by oxygen reduction reaction with carbon-based metal-free photocatalysts.

|  | **Catalyst** | **Light source** | **H2O2 yield**  **( μmol g-1 h-1 )** | **AQY (%)** | **AQY Wavelength (nm)** | **Ref.** |
| --- | --- | --- | --- | --- | --- | --- |
| 1 | Carbon dots with Anthraquinone (CD-AQ) | AM 1.5  (100 mW cm-2) | 2512 | 26.4 | 340 | This work |
| 2 | Carbon dot (CD) | AM 1.5  (100 mW cm-2) | 333 | 2.82 | 340 | This work |
| 3 | g-C3N4 | Xe lamp ( λ > 420 nm ),  (light intensity at 420–500 nm: 26.9 W m–2) | 125 | 23.0 | 330 | S1 |
| 4 | g-C3N4 / AQ-COOH | AM 1.5  (100 mW cm-2) | 361 | 19.5 | 380 | S2 |
| 5 | DCN-15A (Holey defective g-C3N4) | AM 1.5 (λ > 420 nm) | 96.8 | 11.0 | 420 | S3 |
| 6 | OCN | Xe lamp ( λ > 420 nm ), 35.2 mW cm-2 | 2920 | 10.2 | 420 | S4 |
| 7 | g‐C3N4 / PDI‐BN0.2‐rGO0.05 | Xe lamp ( λ > 420 nm ),  (light intensity at 420–500 nm: 43.3 W m–2) | 30.8 | 7.3 | 420 | S5 |
| 8 | g-C3N4 / PDI / rGO0.05 | Xe lamp ( λ > 420 nm ),  (light intensity at 420–500 nm: 43.3 W m–2) | 24.2 | 6.1 | 420 | S6 |
| 9 | R370-CN  (Reduced g-C3N4 prepared at 370 ℃) | Xe lamp ( λ > 420 nm ) | 170.0 | 4.3 | 420 | S7 |
| 10 | PCNBA0.2 (Polymetric carbon nitride prepared by using barbituric acid and melem as precursors) | Xe lamp ( λ > 420 nm ),  (light intensity at 400–500 nm: 30.3 W m–2) | 39.7 | 4.0 | 420 | S8 |
| 11 | PI5.0-NCN (Assembling perylene imides on g-C3N4 nanosheets) | Xe lamp ( λ > 420 nm ), 560 mW cm-2 | 1200.0 | 3.2 | > 420 | S9 |
| 12 | PEI / C3N4 (Polyethylenimine onto carbonitride) | AM 1.5  (100 mW cm-2) | 208.1 | 2.1 | 420 | S10 |


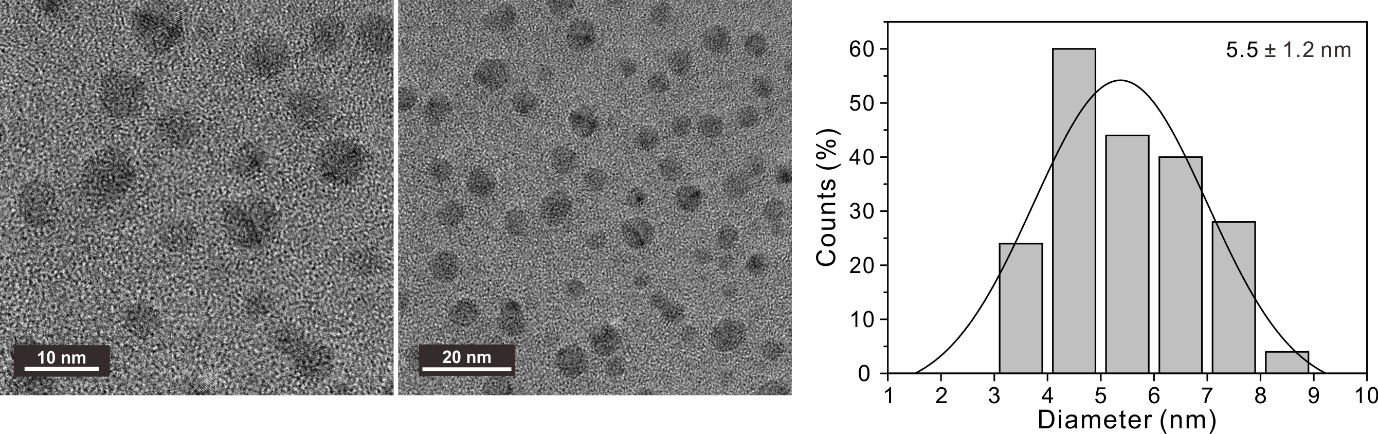


**Fig. S1** TEM images of bare CDs with a corresponding size distribution histogram counted 100 samples.


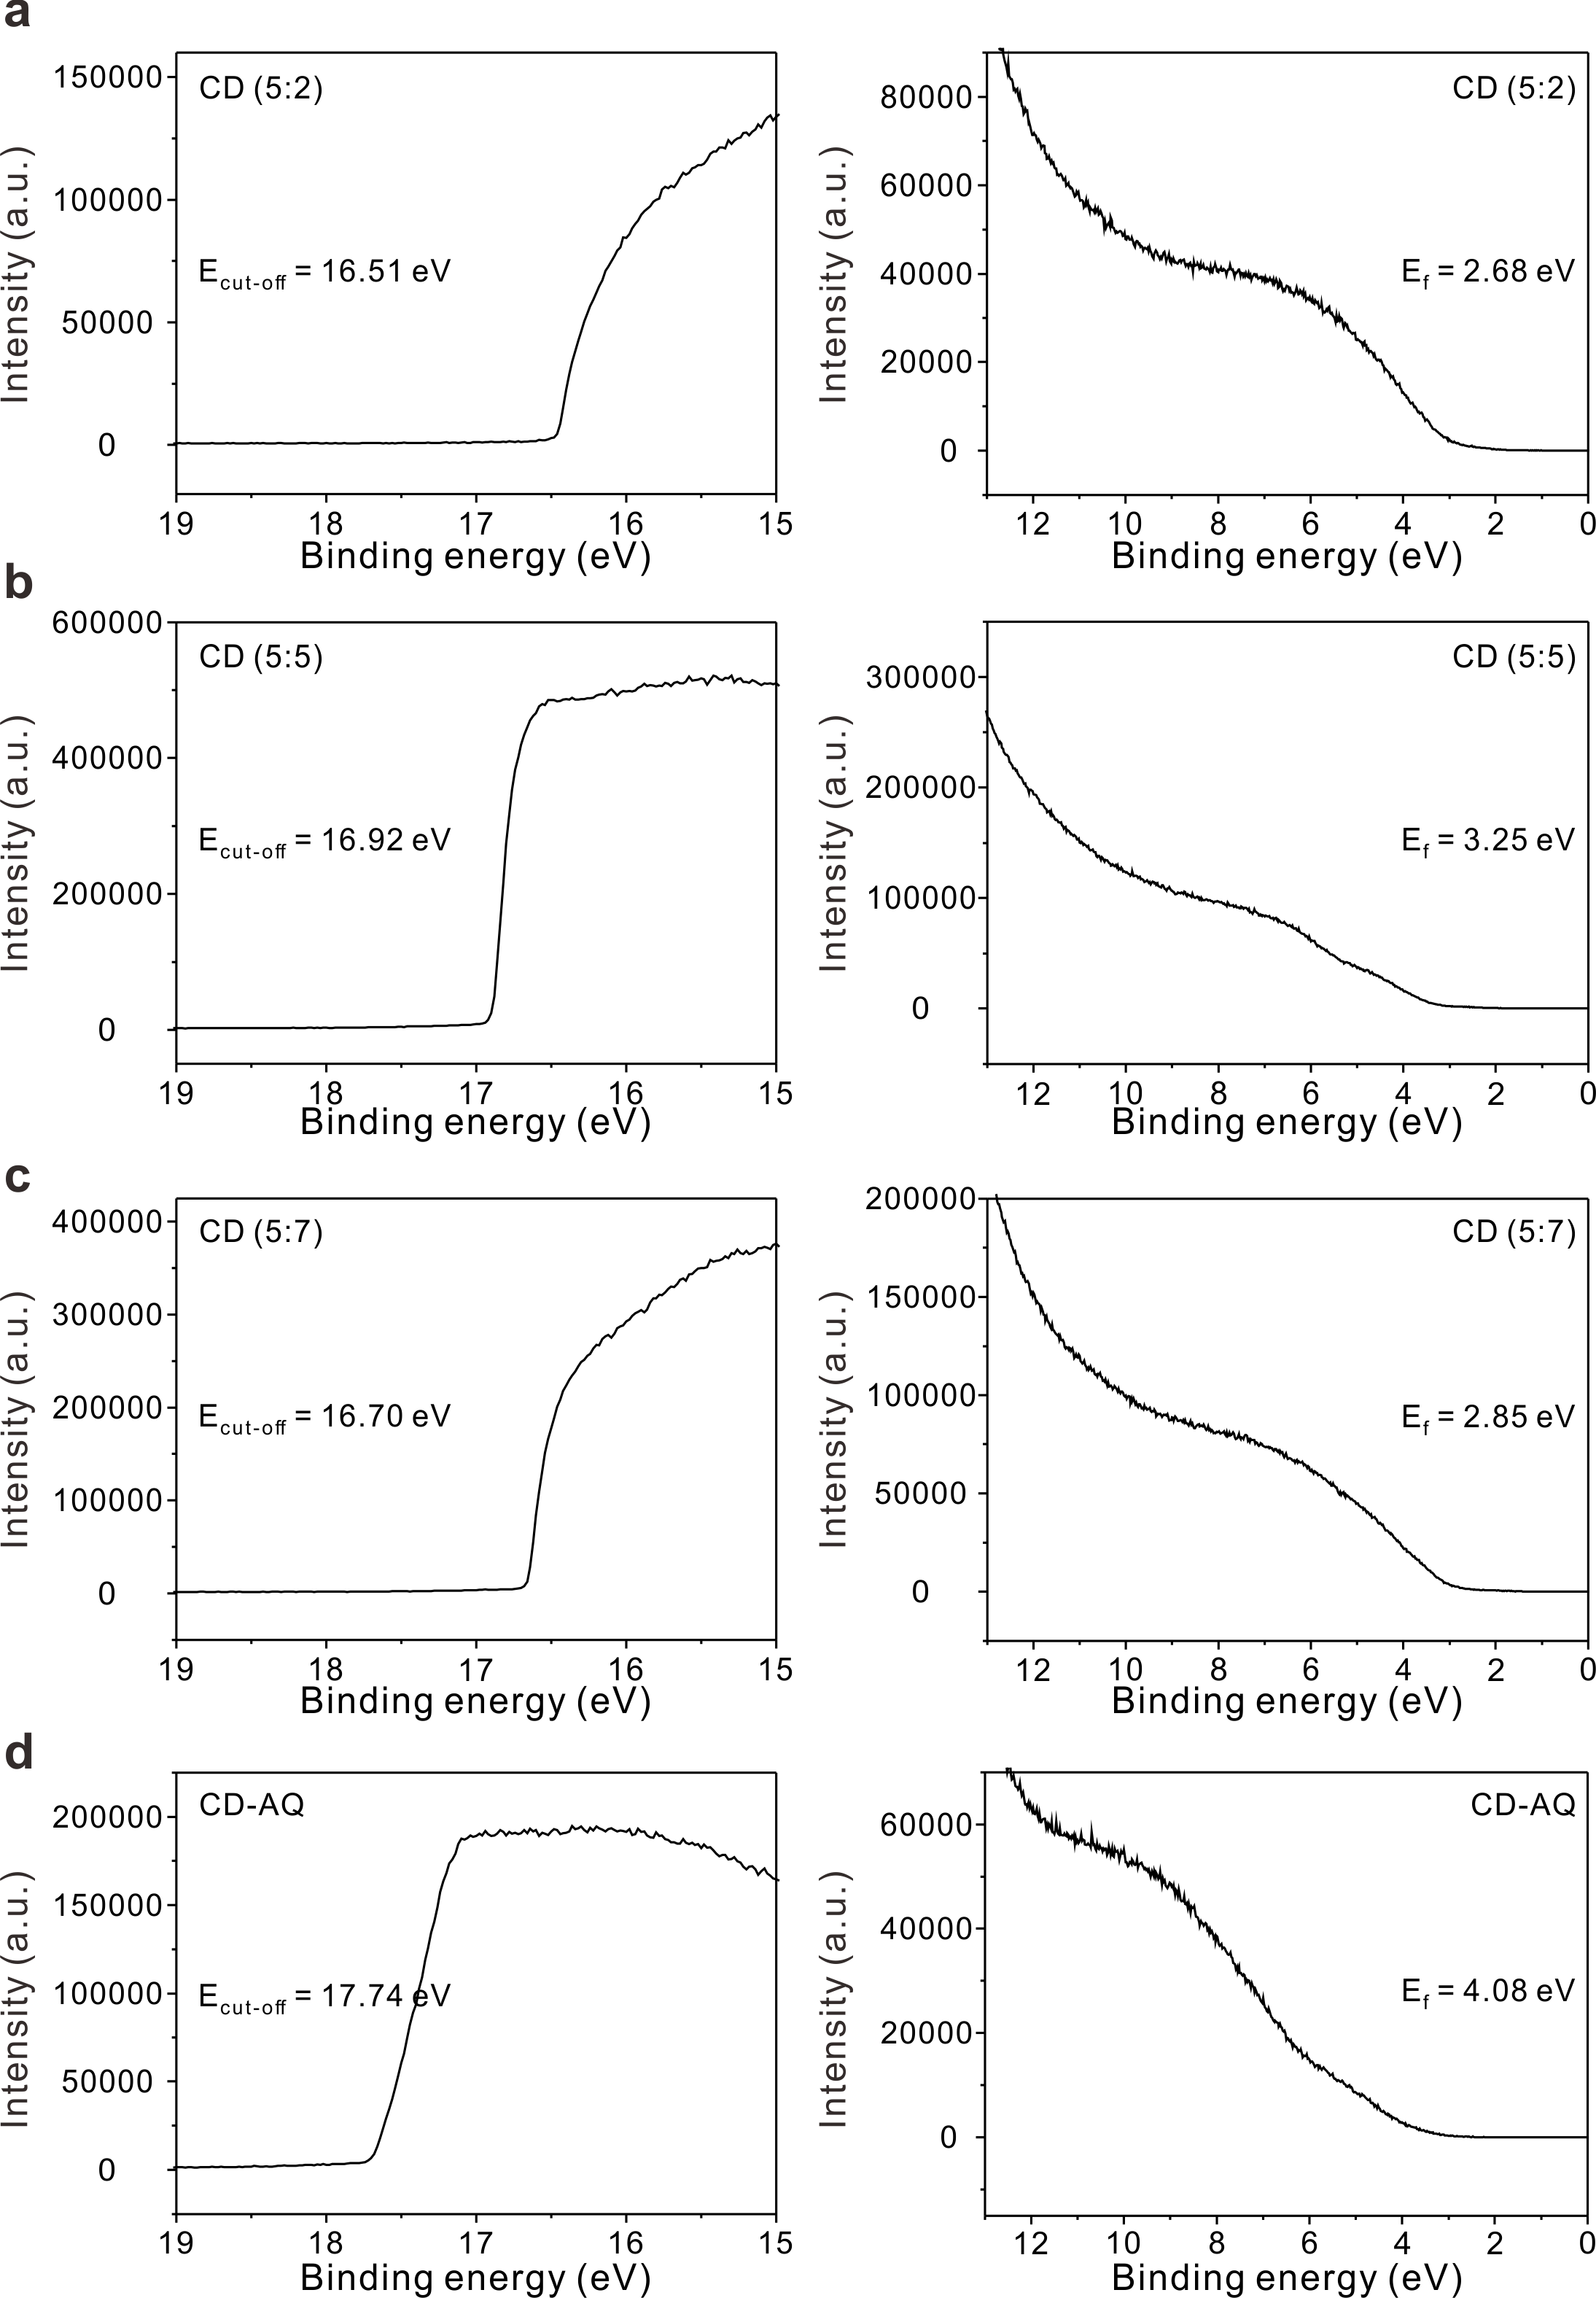


**Fig. S2** High-resolution UPS spectra of (a–c) CDs with varying the molar ratio of (a) 5:2, (b) 5:5, (c) 5:7, and (d) CD-AQ.


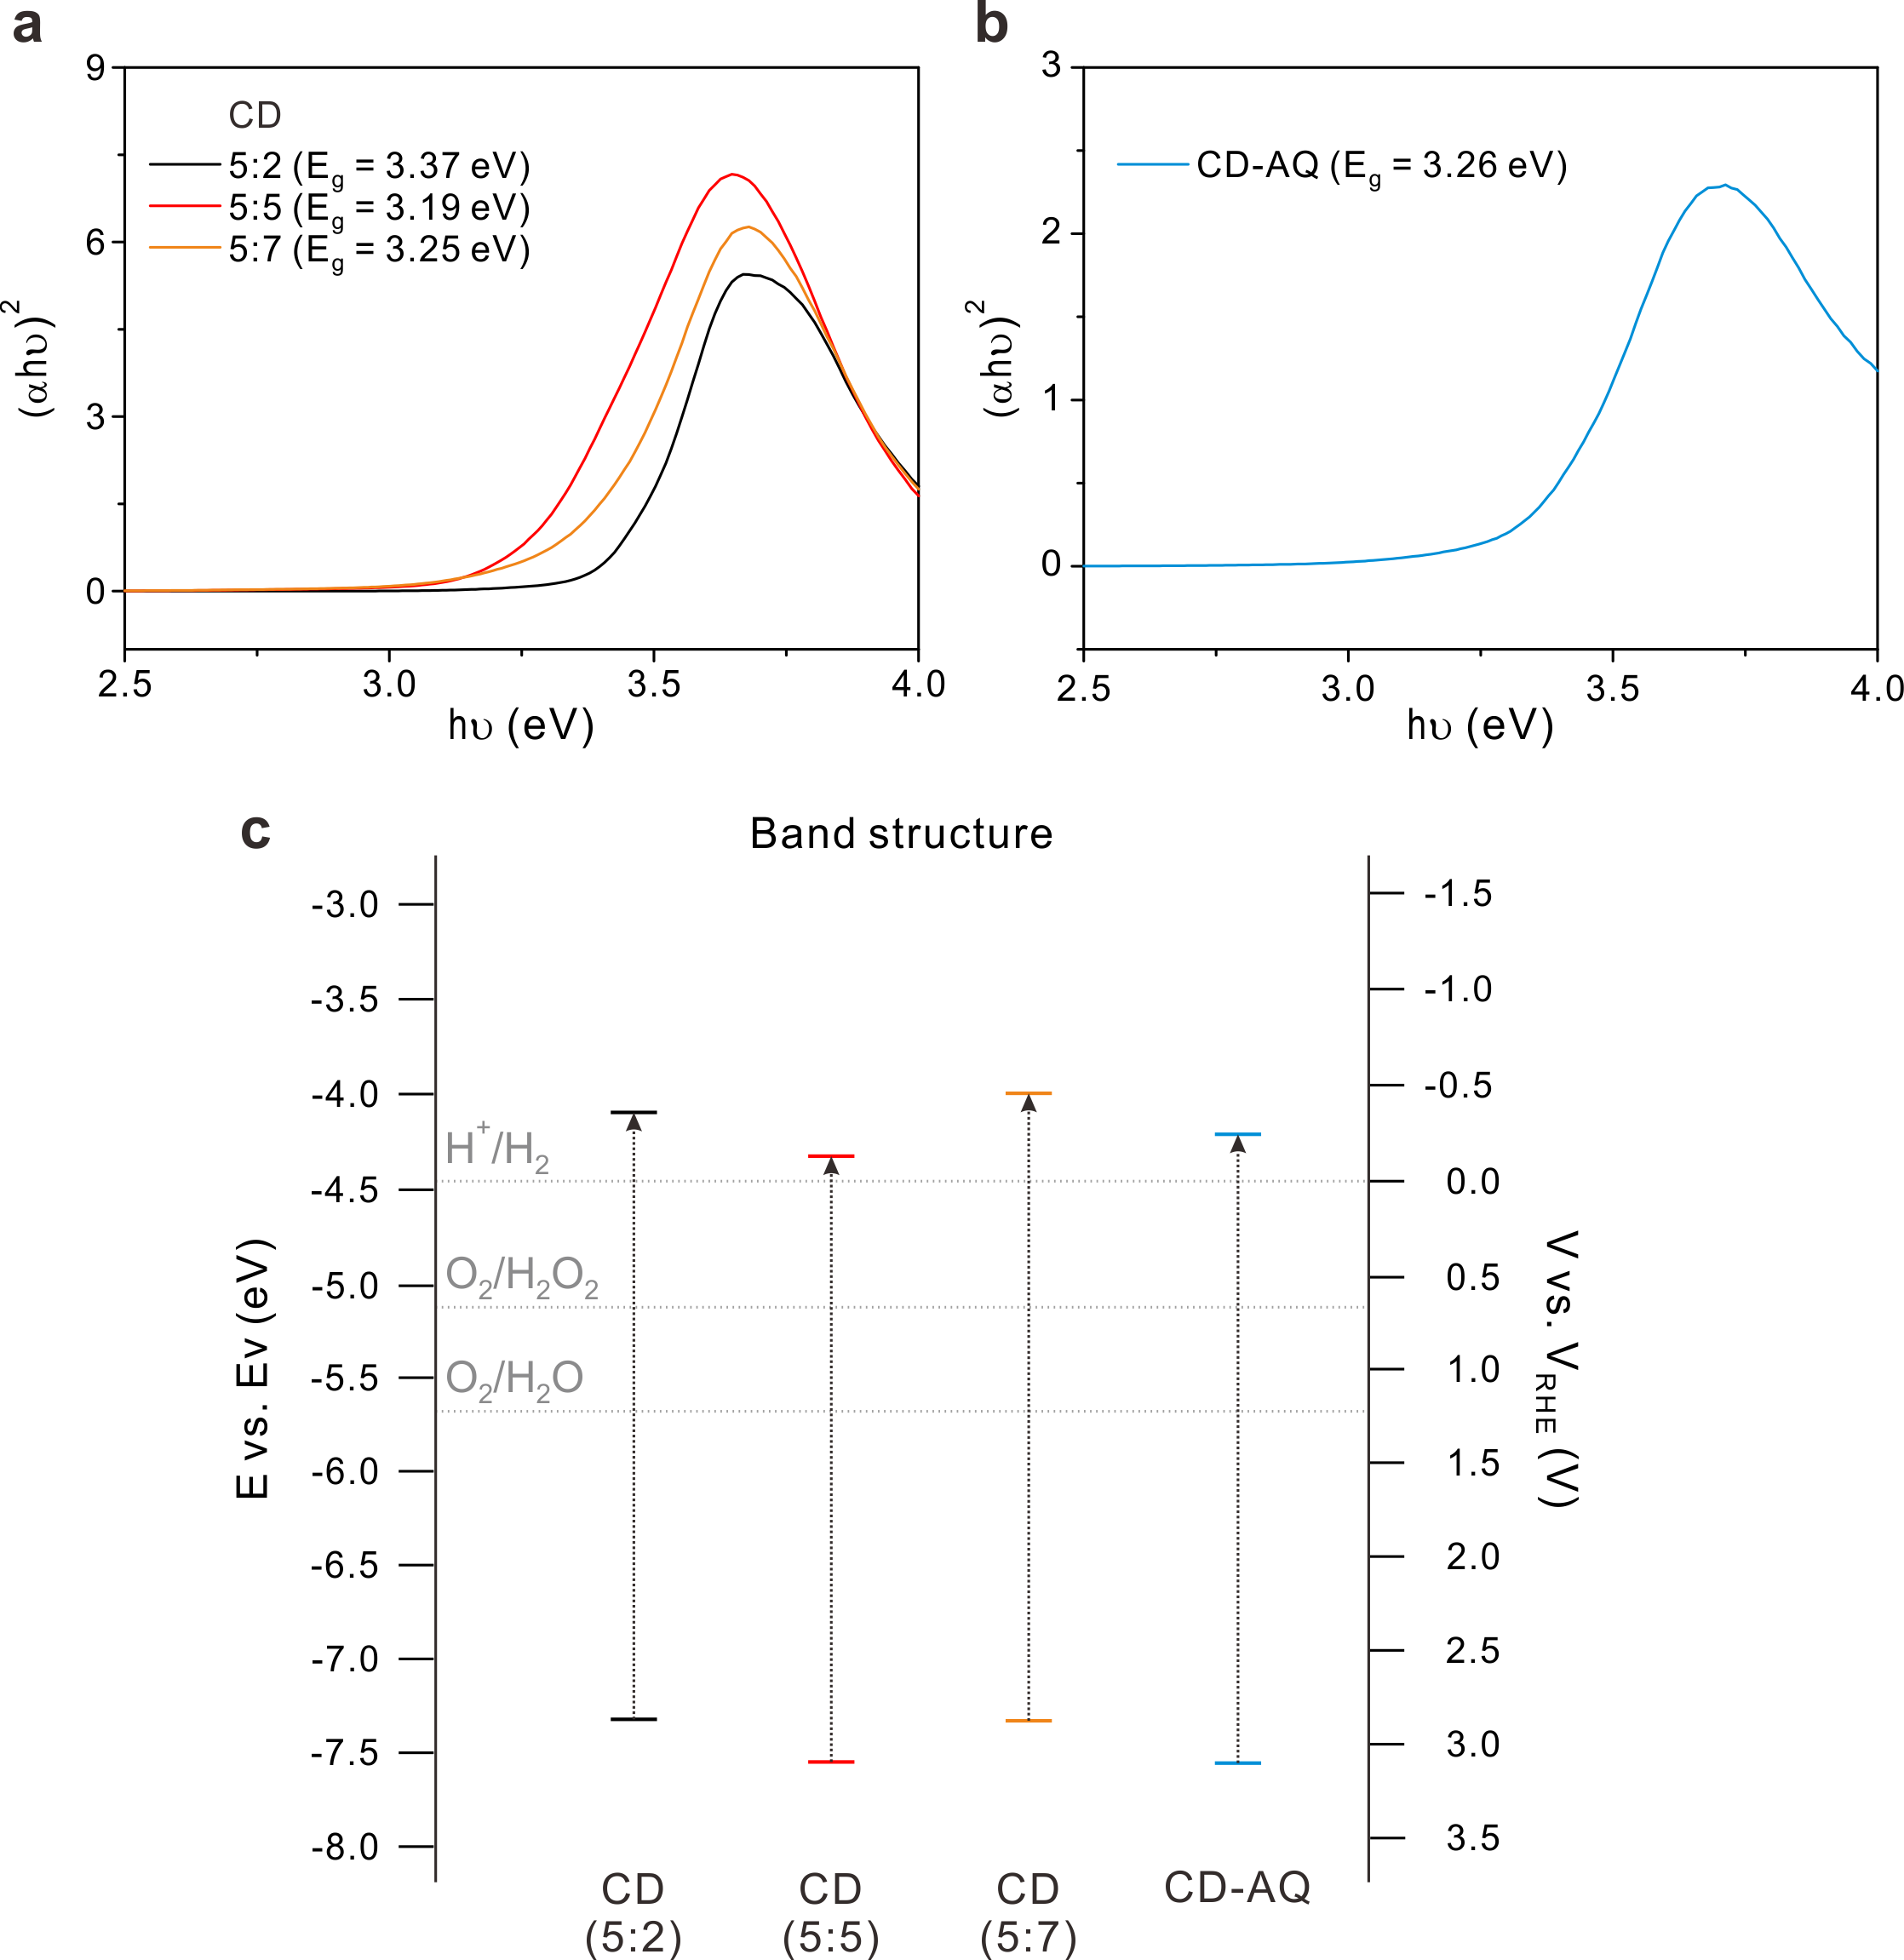


**Fig. S3** (a-c) Tauc’s plots of (a) various CDs prepared in molar ratio of CA and EDA precursors and (b) CD-AQ to estimate their corresponding band gap energy (*E*g). (c) Energy diagram of all CDs and CD-AQ.


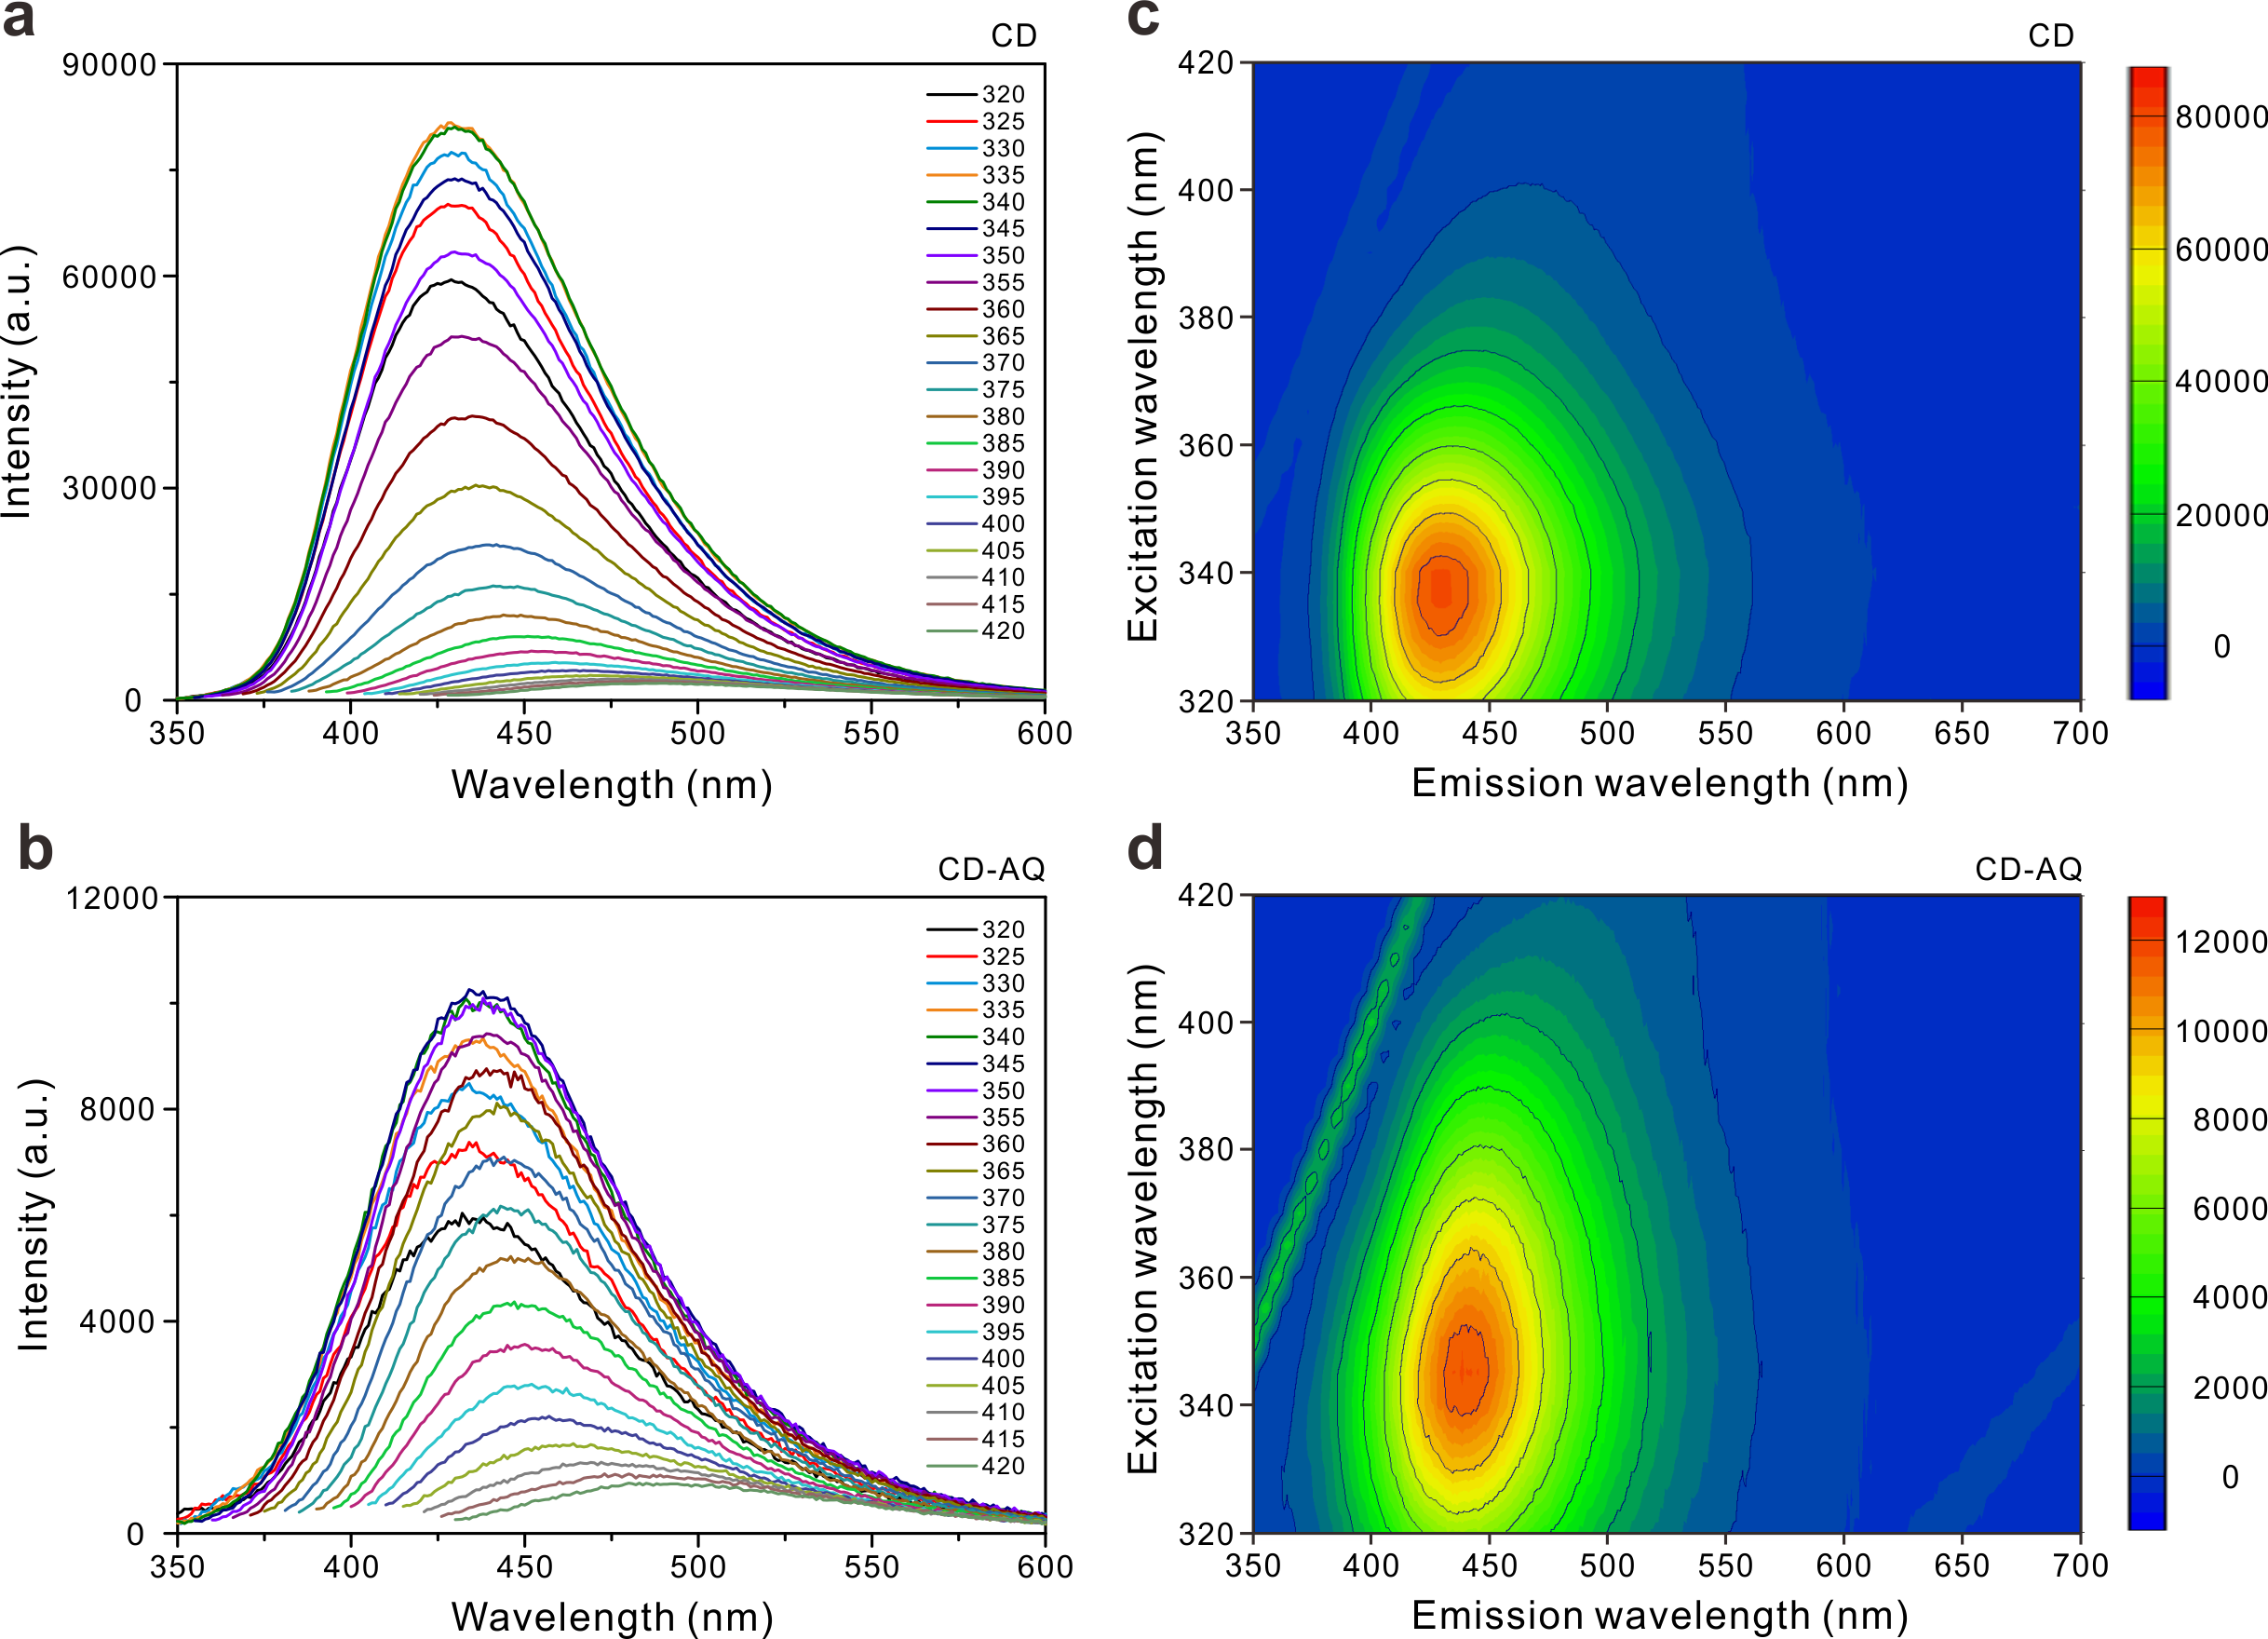


**Fig. S4** (a-b) PL spectra as a function of excitation wavelength of (a) bare CD and (b) CD-AQ. (c-d) Excitation/emission contour plots of (c) bare CD and (d) CD-AQ.


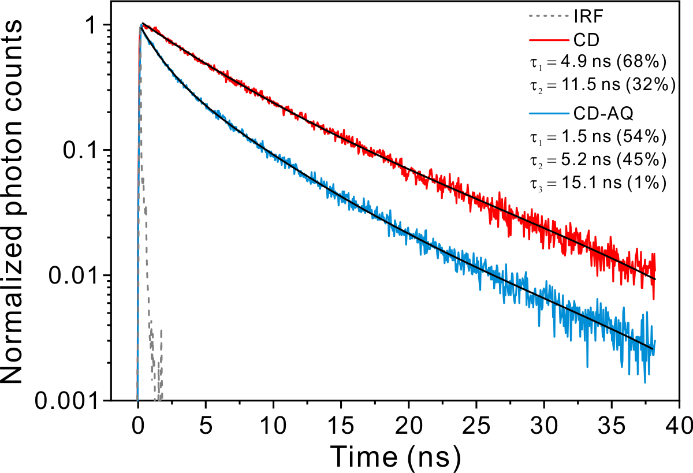


**Fig. S5** PL decay profile from ensemble time-correlated single photon counting (TCSPC) measurements for CD and CD-AQ (λex = 360 nm and λem = 450 nm).


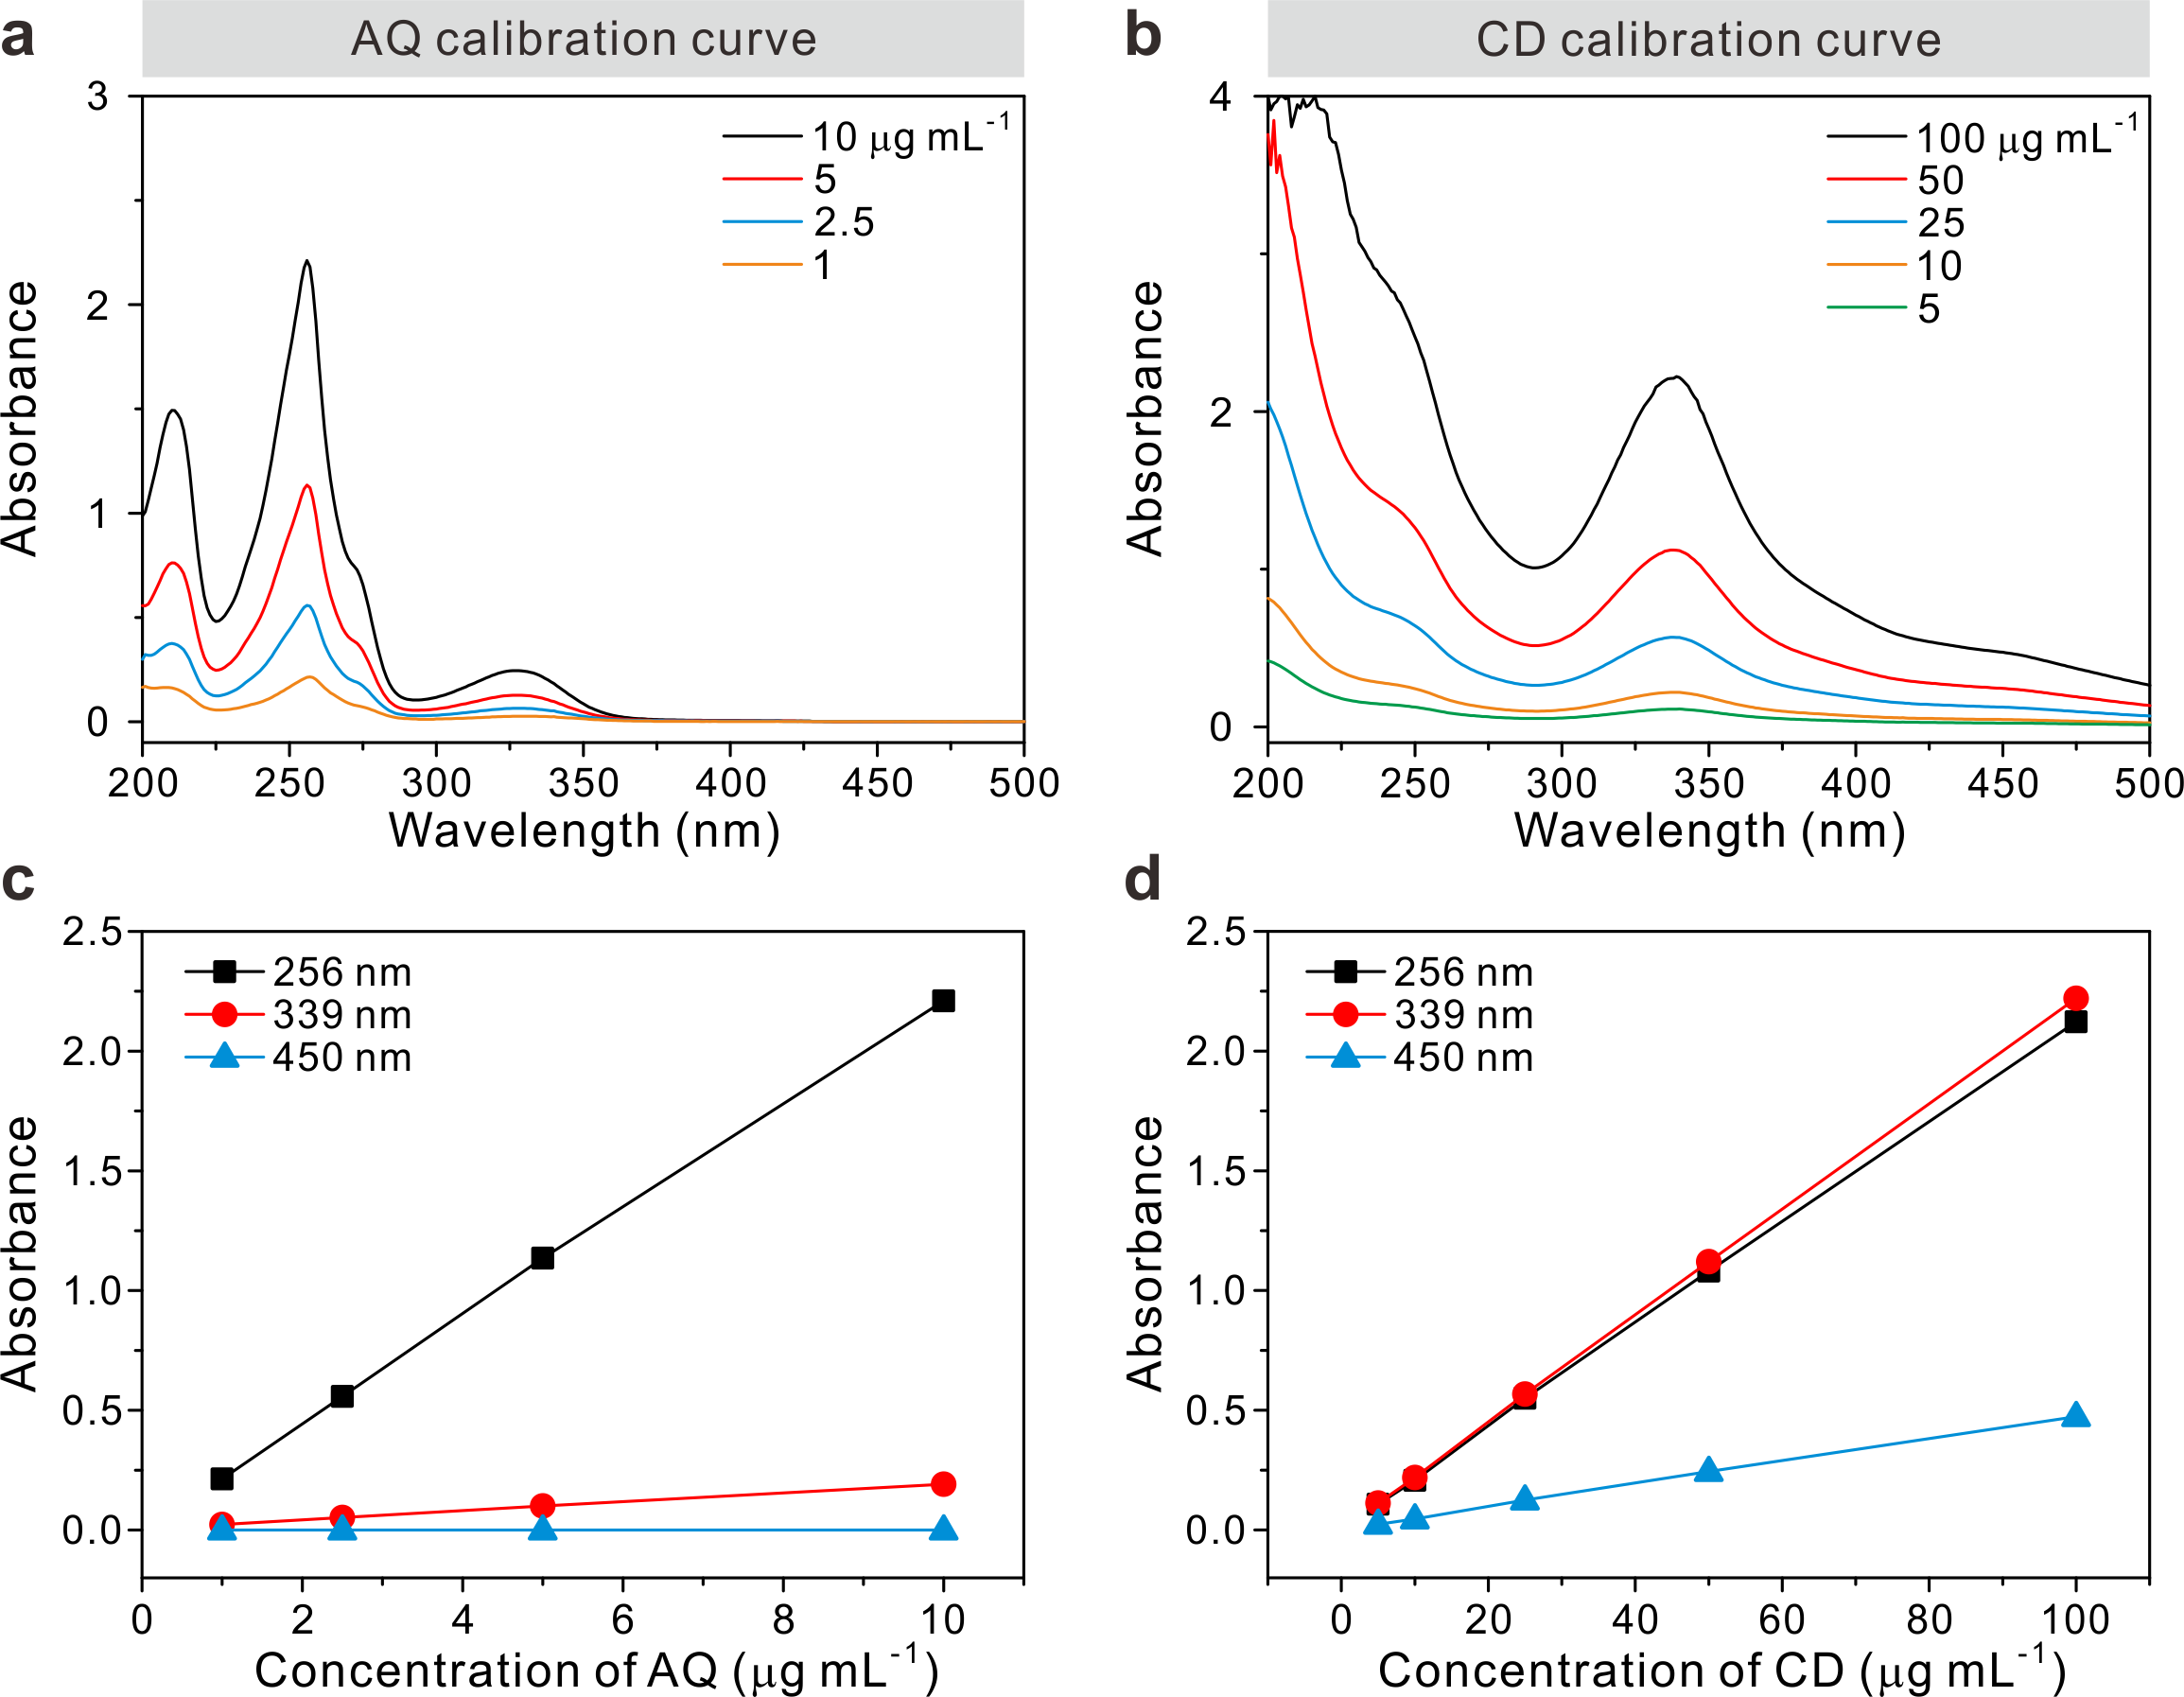


**Fig. S6** (a-b) Calibration curves of (a) AQ and (b) CD using UV/vis spectra. (c-d) The corresponding absorbance maxima of (c) AQ and (d) CD at 256, 339, and 450 nm.


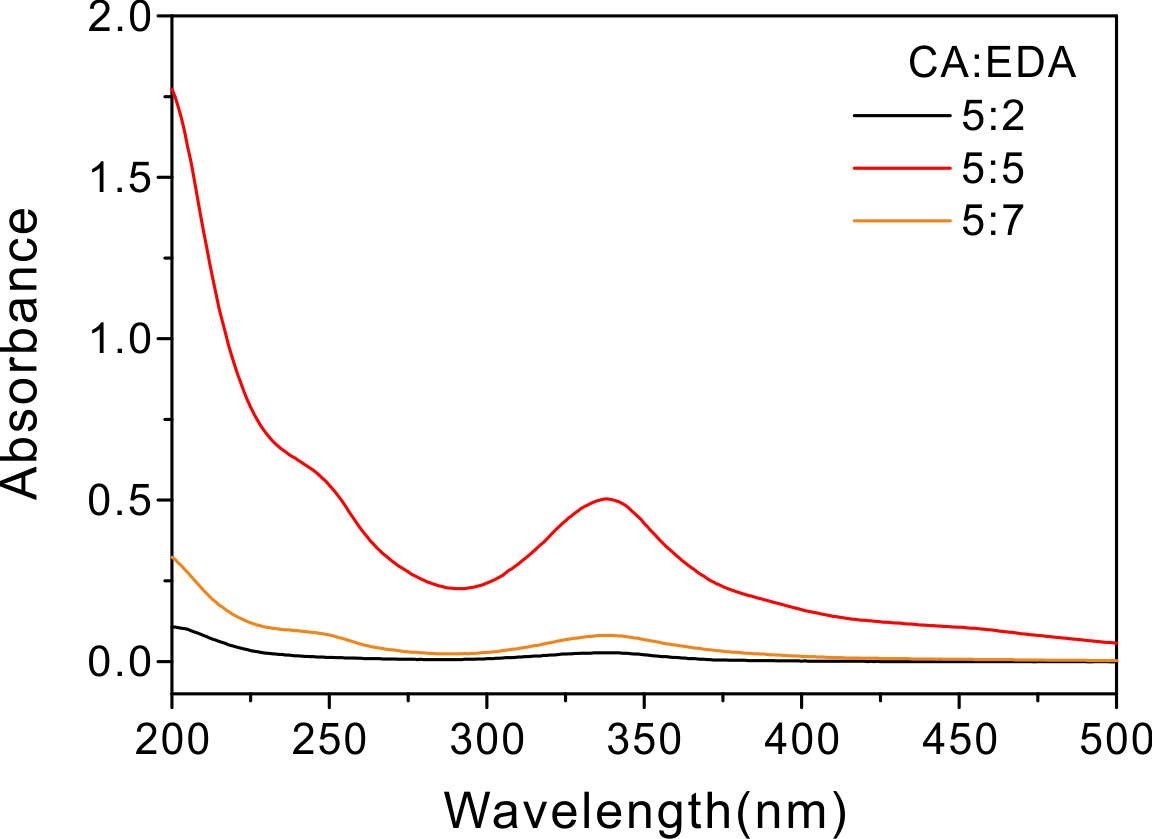


**Fig. S7** UV/vis spectra of various CDs prepared in different ratios of CA and EDA precursors. The concentration of all CDs is fixed to 0.032 mg L-1.


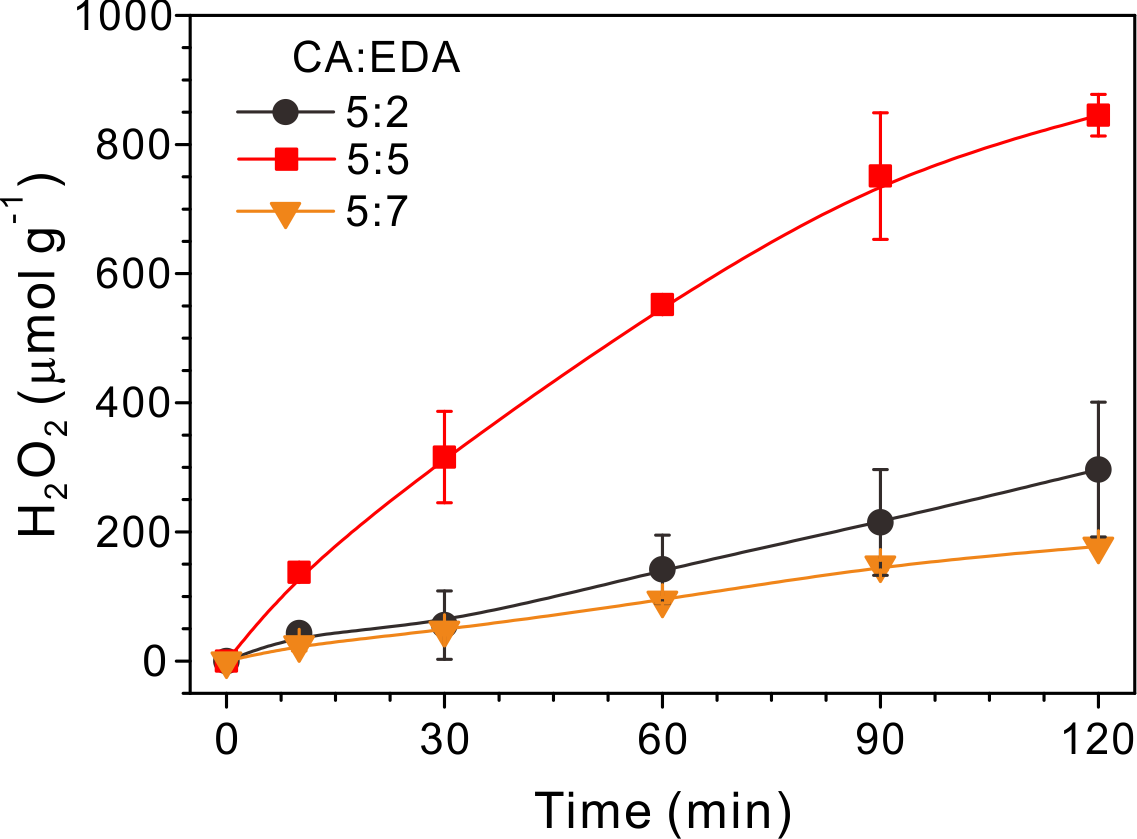


**Fig. S8** Time-dependent profiles of H2O2 production on various CDs prepared in different ratios of CA and EDA precursors.


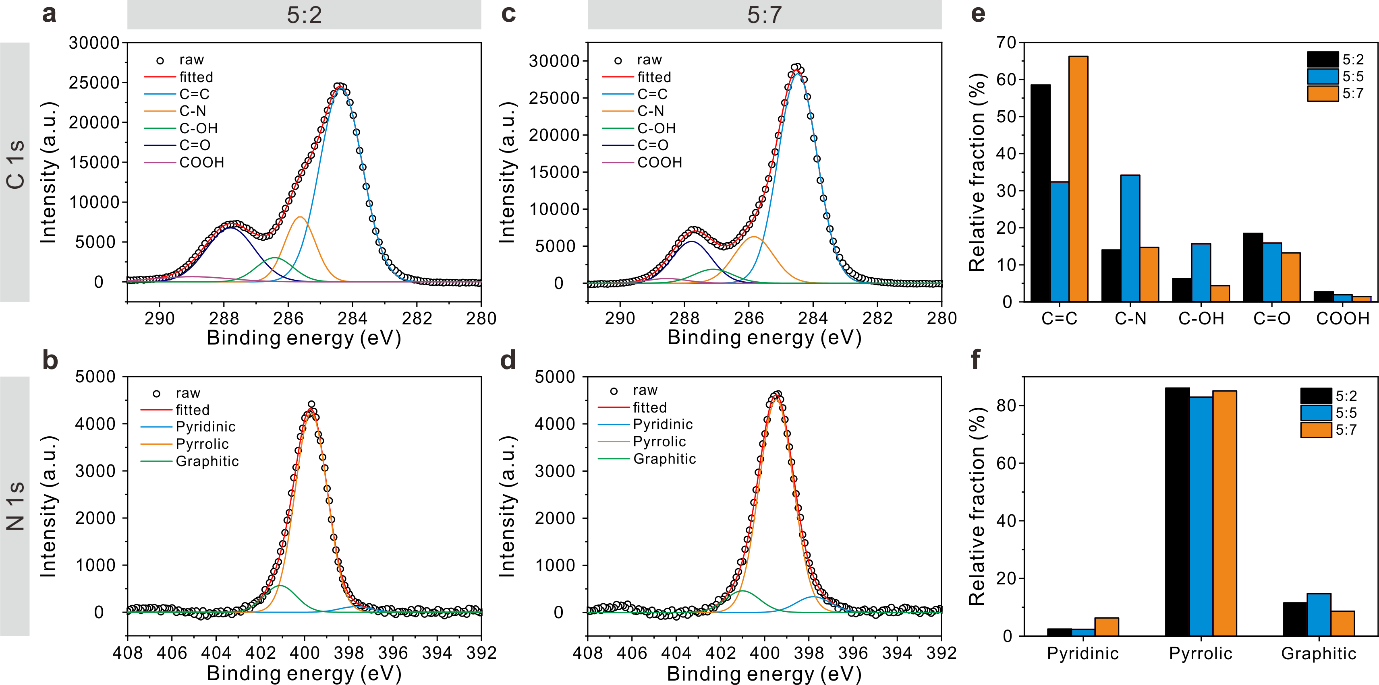


**Fig. S9** Deconvoluted high-resolution XPS spectra of (a, c) C 1s and (b, d) N 1s for 5:2 and 5:7 CDs prepared in different molar ratios of CA and EDA precursors. The relative fraction in the chemical compositions of (e) C 1s and (f) N 1s for varying CDs (5:2, 5:5, and 5:7 of CA:EDA).


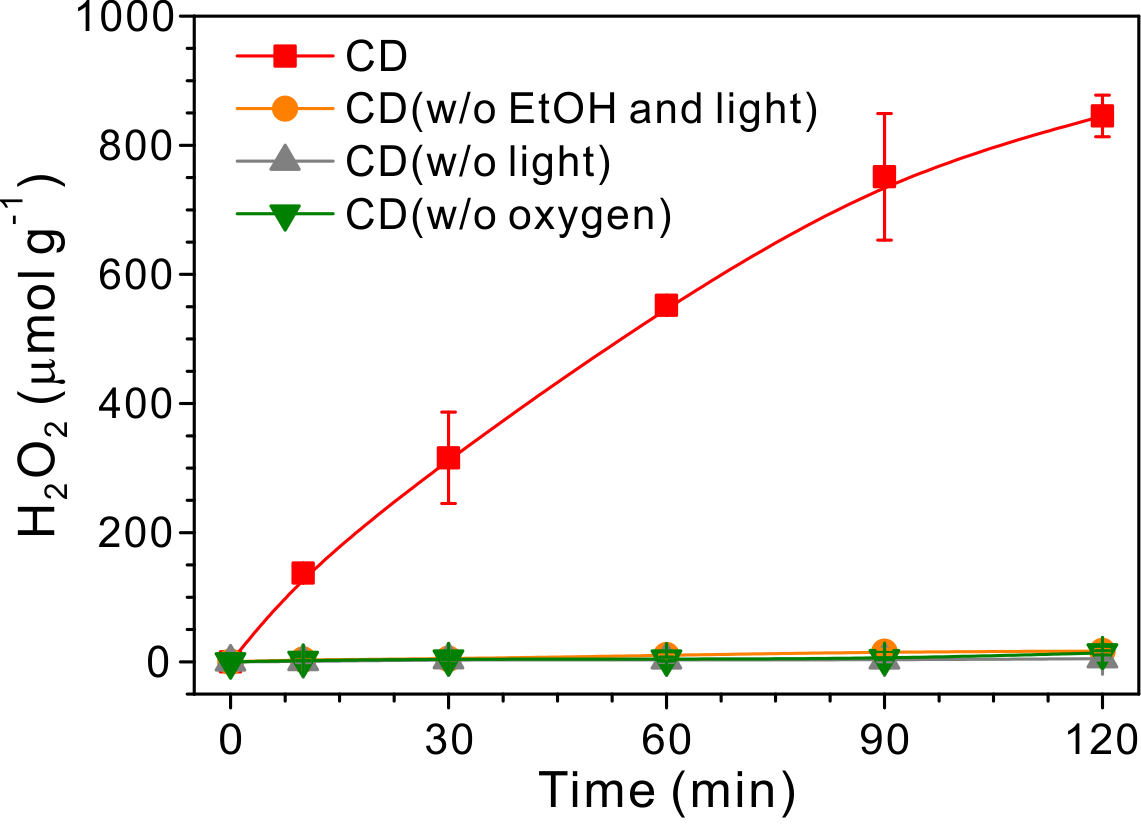


**Fig. S10** Time-dependent profiles of H2O2 production by CD under various reaction conditions. Each experimental condition was under (red) O2-saturated with 10 vol% of ethanol with light irradiation, (orange) O2-saturated without ethanol and light irradiation, (gray) O2-saturated with 10 vol% of ethanol without light irradiation, and (green) Ar-saturated with 10 vol% of ethanol with light irradiation.


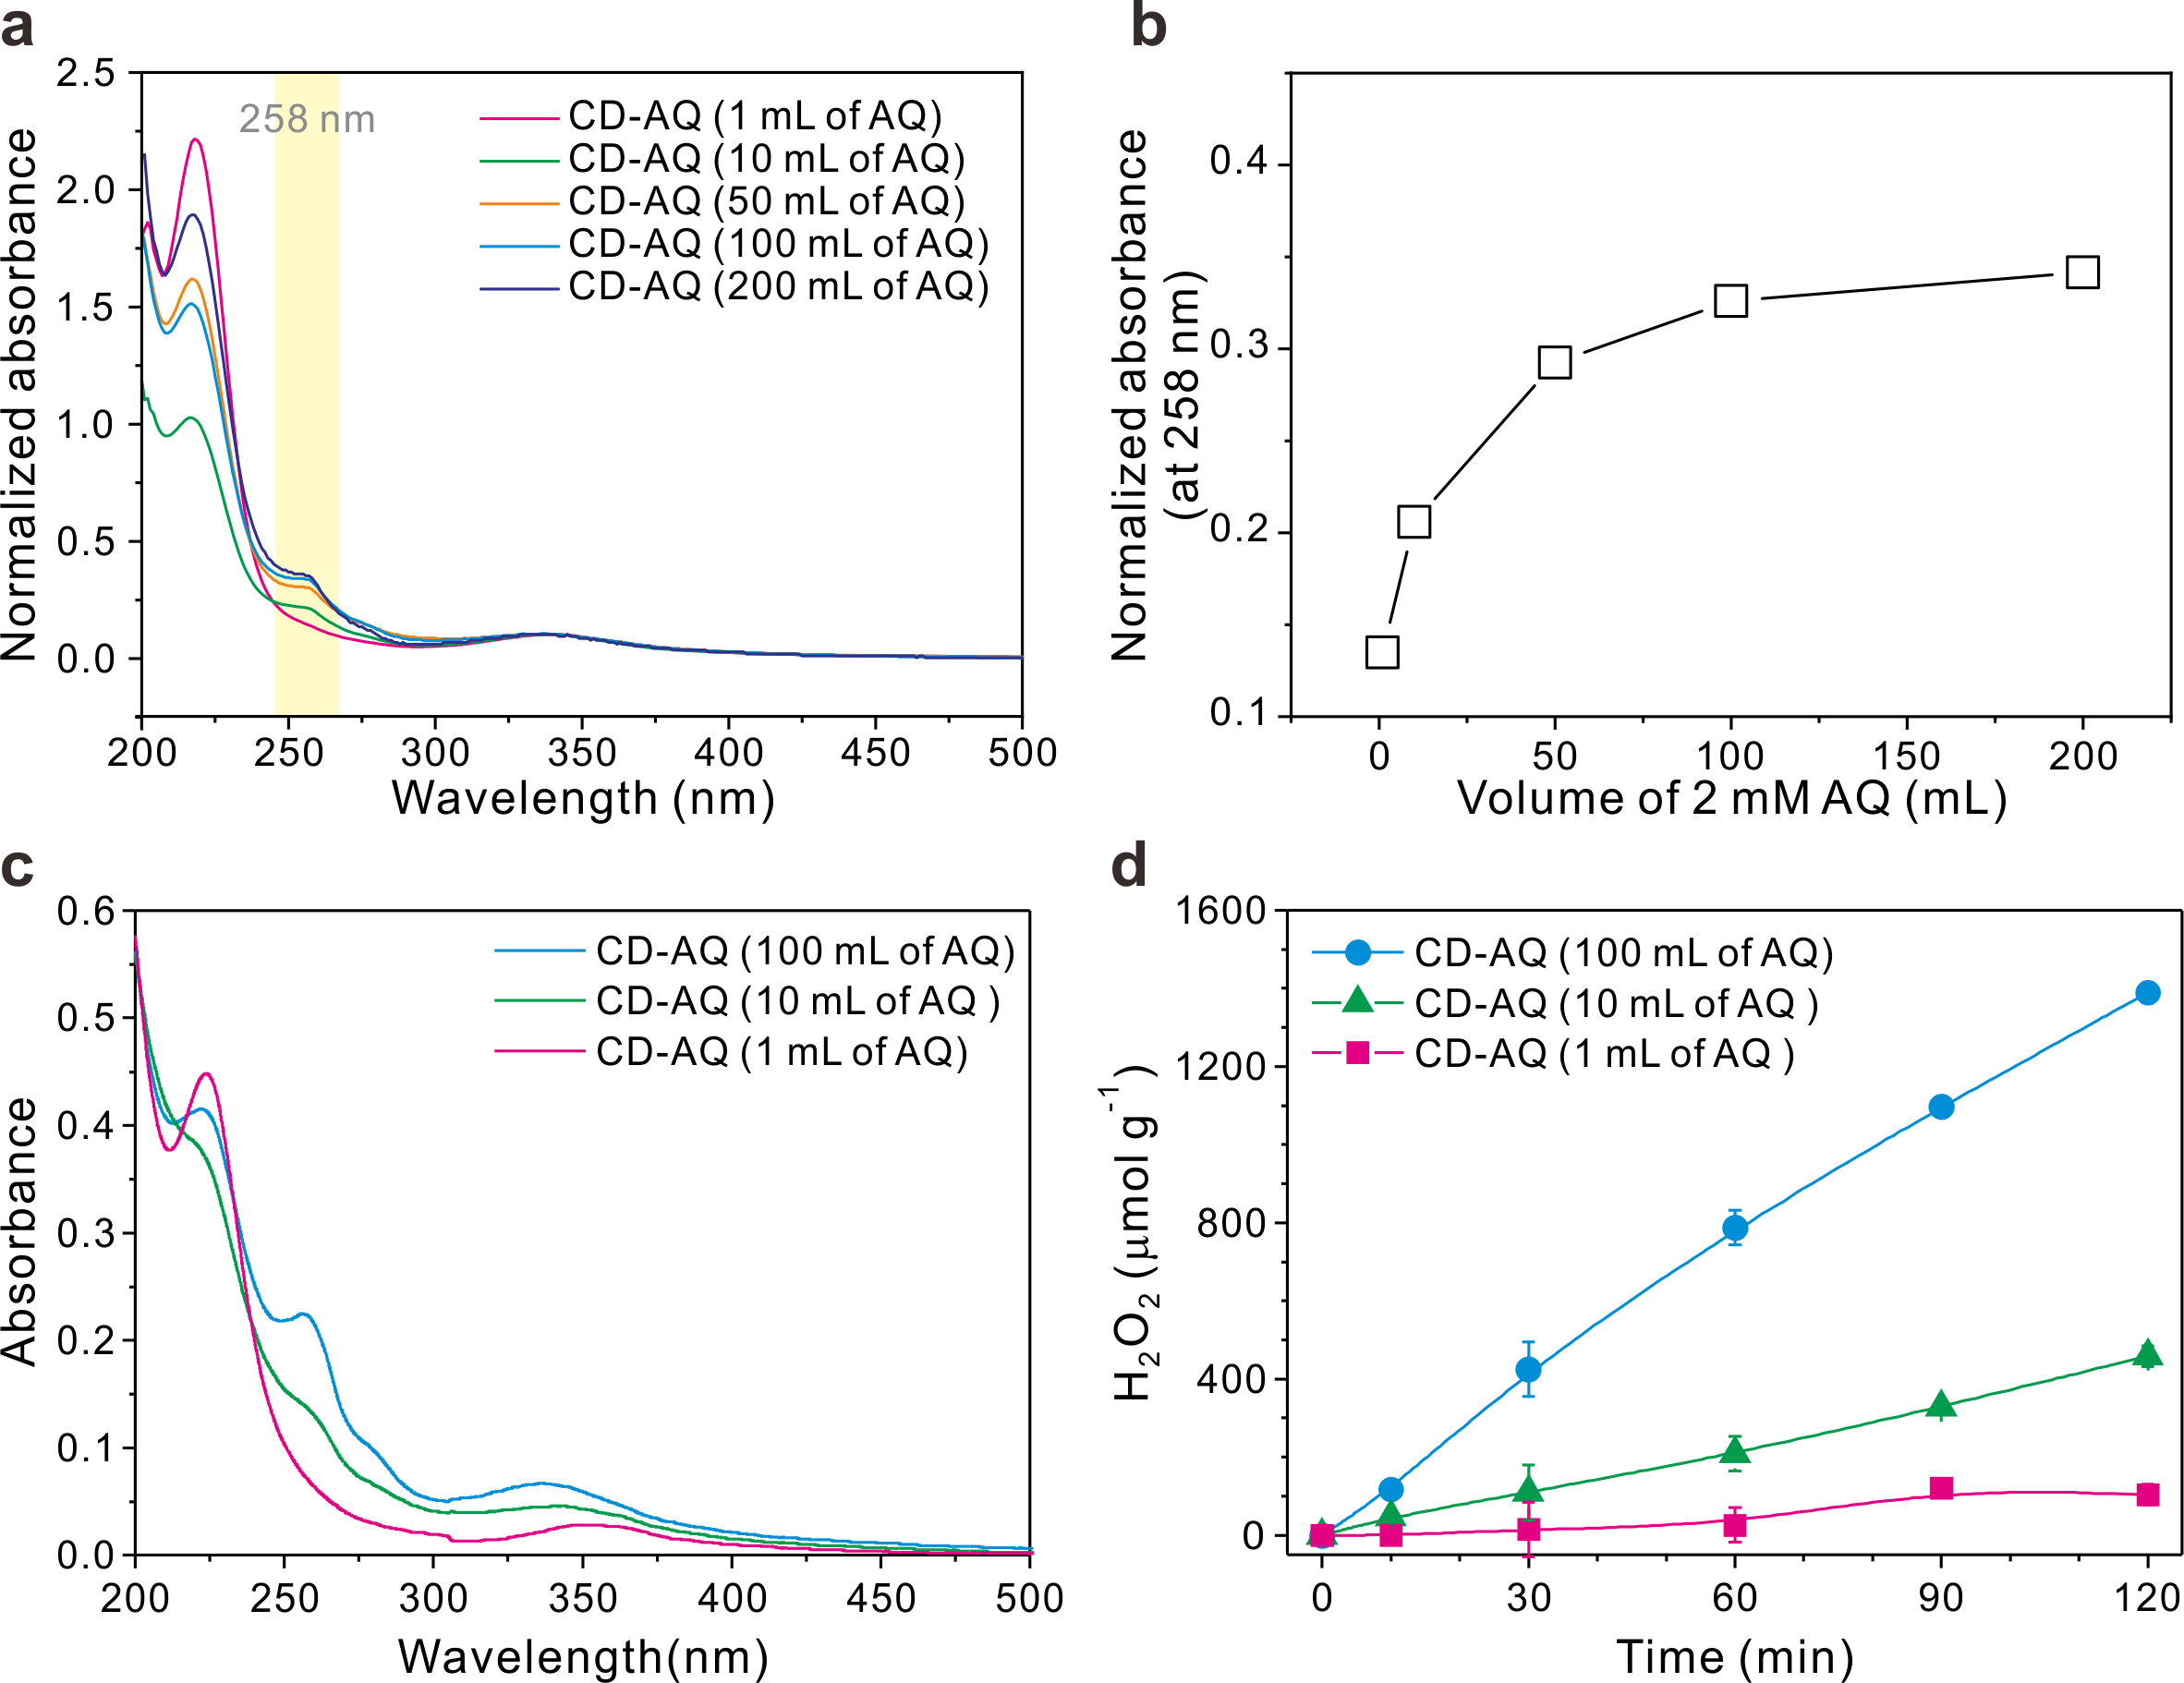


**Fig. S11** (a) Normalized UV/vis spectra and (b) corresponding normalized absorbance at 258 nm of various CD-AQ nanohybrids prepared in different amounts of 2 mM AQ solution. (c) UV/vis spectra at a concentration of 12.7 mg L-1 and (d) time-dependent H2O2 production of various CD-AQ nanohybrids prepared in different amounts of AQ. A concentration solution of AQ (2 mM) in varying volume was used to functionalize the CD surface under otherwise identical conditions. Excess free AQ molecules were removed through an extensive dialysis process. The experimental conditions were as follows: [catalyst] = 0.07 g L-1, pHi = 6, 100 mW cm-2 (AM 1.5), [EtOH]0 = 10 vol% (as an electron donor), and O2-saturated.


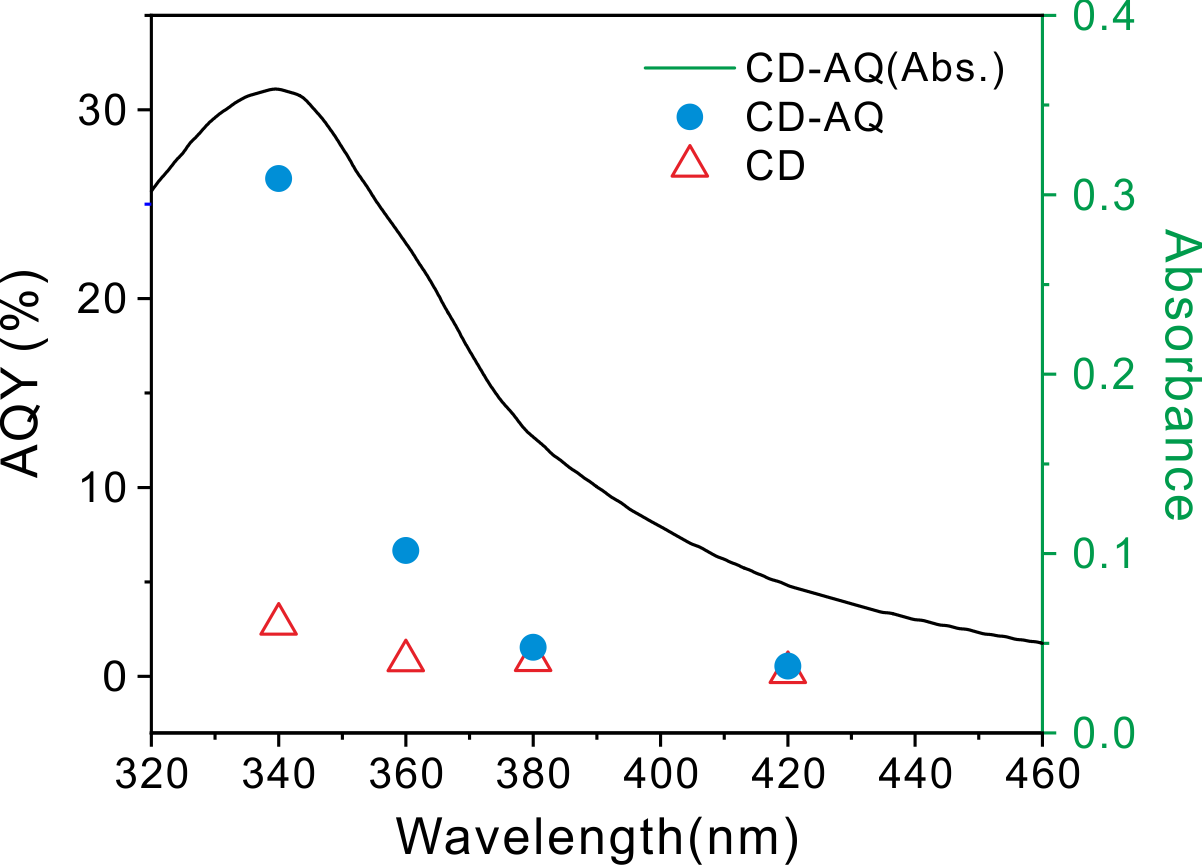


**Fig. S12** Absorption spectrum (black) and apparent quantum yield (AQY, blue) of the photocatalytic H2O2 production as a function of wavelength on CD and CD-AQ. The experimental conditions were as follows: [catalyst] = 0.176 g L-1, [EtOH]0 = 10 vol%, and O2-saturated.

AQY was obtained by illuminating the suspension of CD and CD-AQ while collecting the H2O2 produced in the presence of ethanol electron donor with monochromated light (λ = 340, 360, 380, and 420 nm).


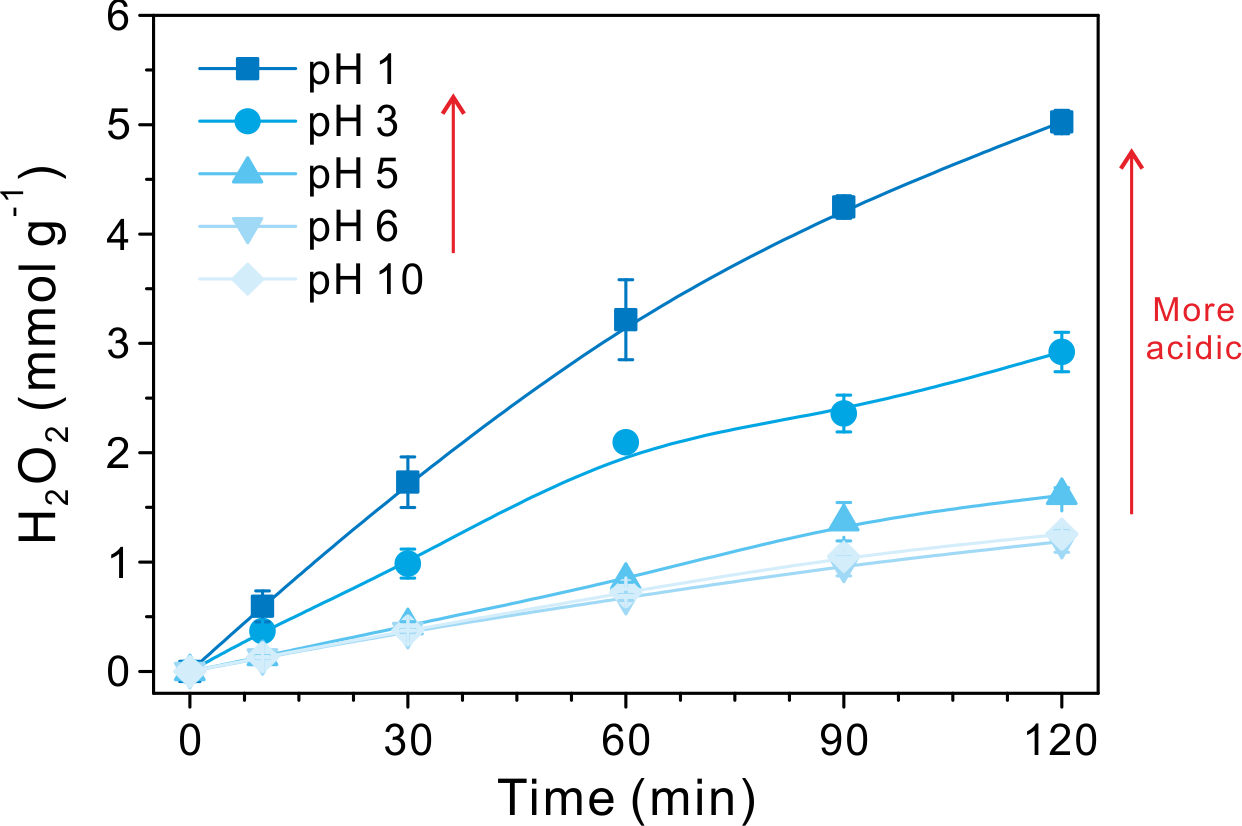


**Fig. S13** Time-dependent profiles of H2O2 production by CD-AQ at various pH conditions.

**
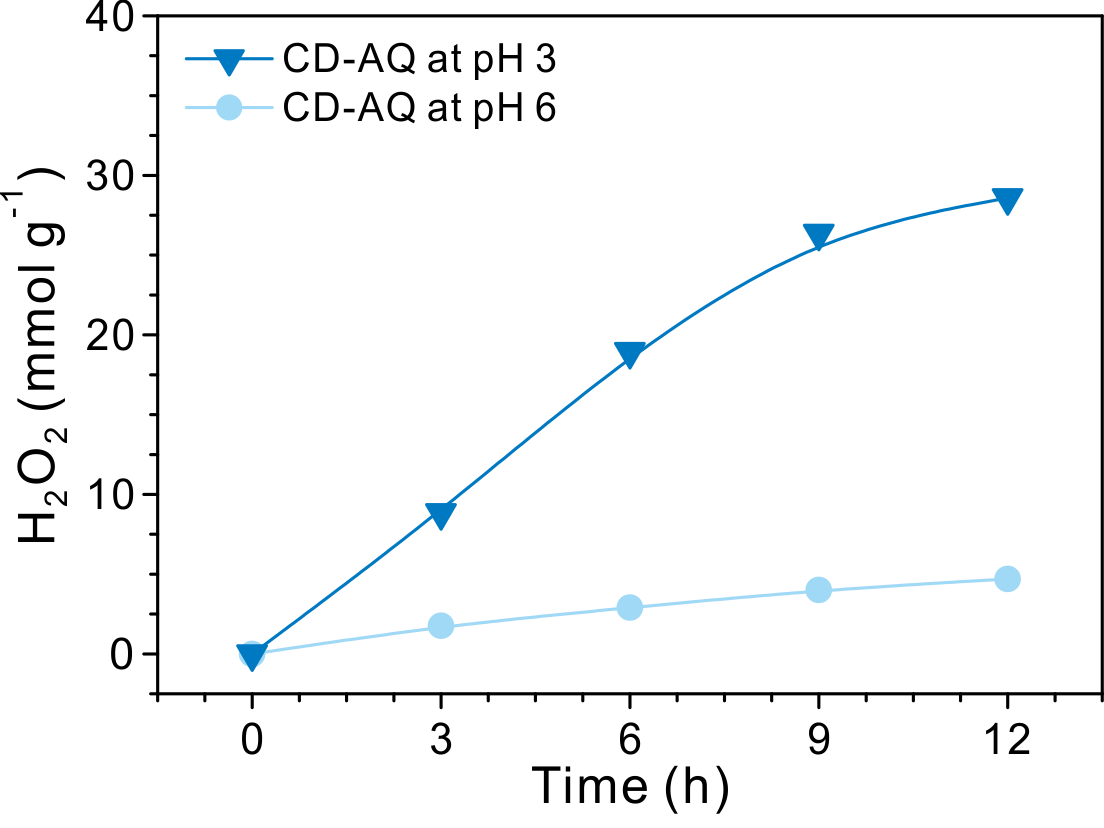
**

**Fig. S14** Long-term performance in the production of H2O2 by CD-AQ under pH 3 and 6 for 12 h reaction. The experimental conditions were as follows: [catalyst] = 0.3 g L-1, [EtOH]0 = 20 vol%, 100 mW cm-2 (AM 1.5), and temperature = 4 °C.


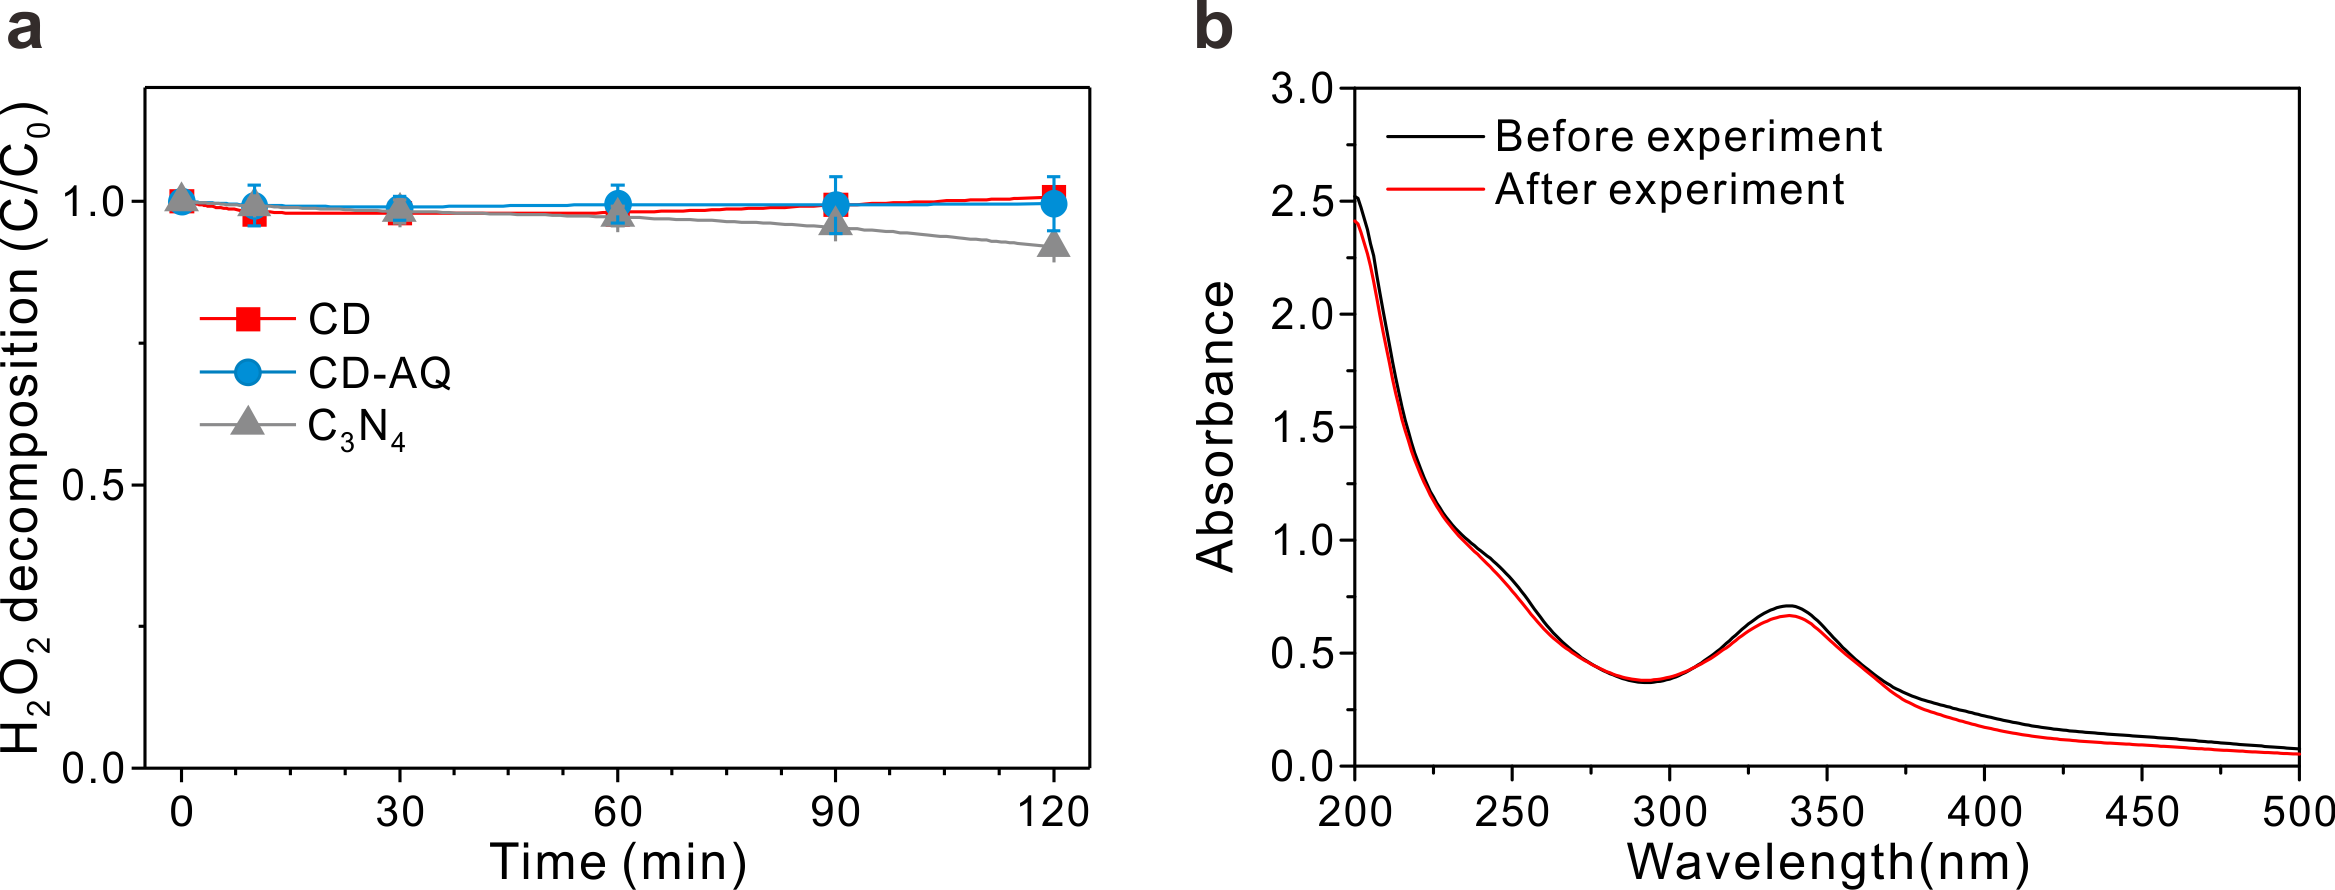


**Fig. S15** (a) Photocatalytic H2O2 decomposition by CD, CD-AQ, and C3N4 at an initial concentration of 1.0 mM H2O2. (b) UV/vis spectra of CD with 10 vol% ethanol before and after light irradiation for 2 h.


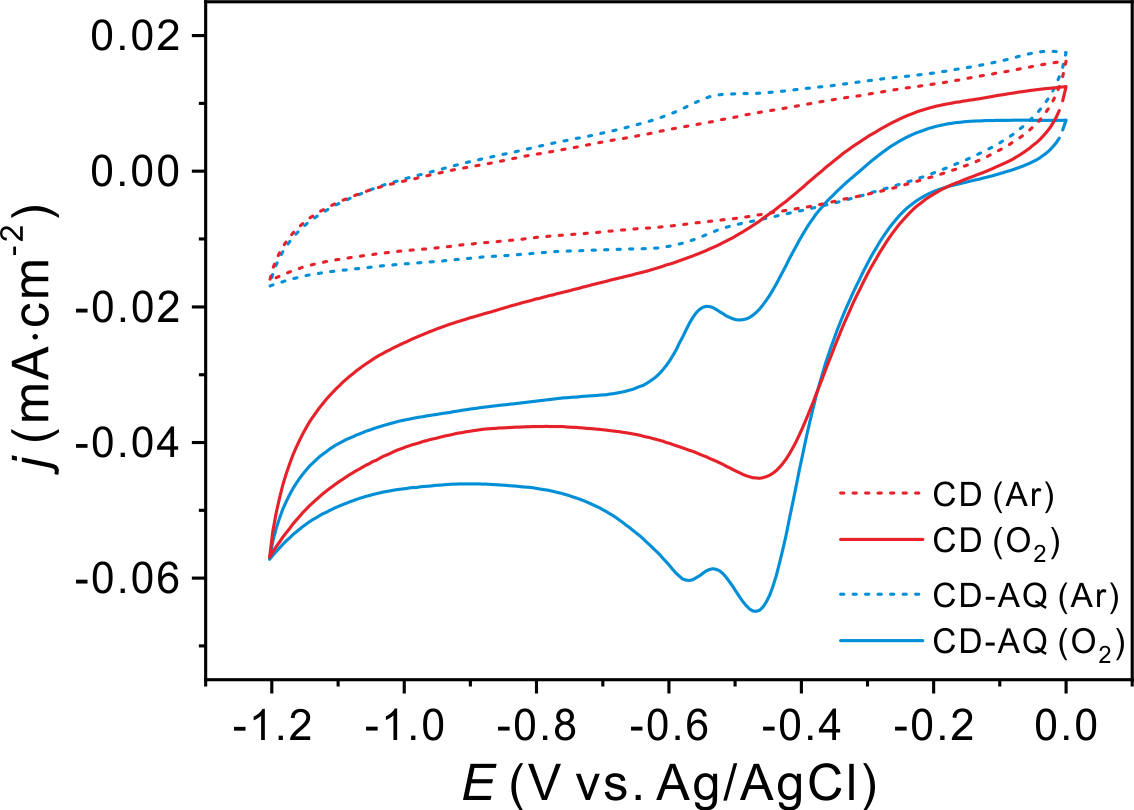


**Fig. S16** Cyclic voltammetry of CD and CD-AQ. Inset shows a magnified CV of CD. All measurements were performed in an Ar- or O2-saturated 0.10 M KOH solution at a scan rate of 10 mV s-1.


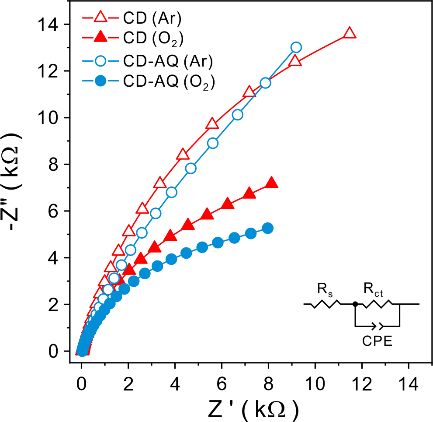


**Fig. S17** Nyquist plots of impedance on CD and CD-AQ in an Ar or O2-saturated dark condition. Inset represents an equivalent circuit. Experimental condition: 1.0 M NaHCO3 electrolyte was used at pH 7.8 and potential was applied at -0.35 V (vs. Ag/AgCl) in frequency range from 0.1 mHz to 0.5 Hz.

**Table 2.** Summary of electrochemical impedance values of CD and CD-AQ.

|  | **Rs (Ω)** | **Rct (kΩ)** | **Q** | |
| --- | --- | --- | --- | --- |
| **Y0**  **(μMho*s^N)** | **N** |
| CD (Ar) | 34.316 | 38.345 | 16.7 | 0.852 |
| CD (O2) | 33.294 | 15.629 | 18.4 | 0.845 |
| CD-AQ (Ar) | 31.205 | 37.245 | 17.7 | 0.812 |
| CD-AQ (O2) | 31.962 | 11.824 | 16.7 | 0.812 |

where Rs is solution resistance, Rct is charge transfer resistance, Y0 is base admittance and N is frequency exponent.


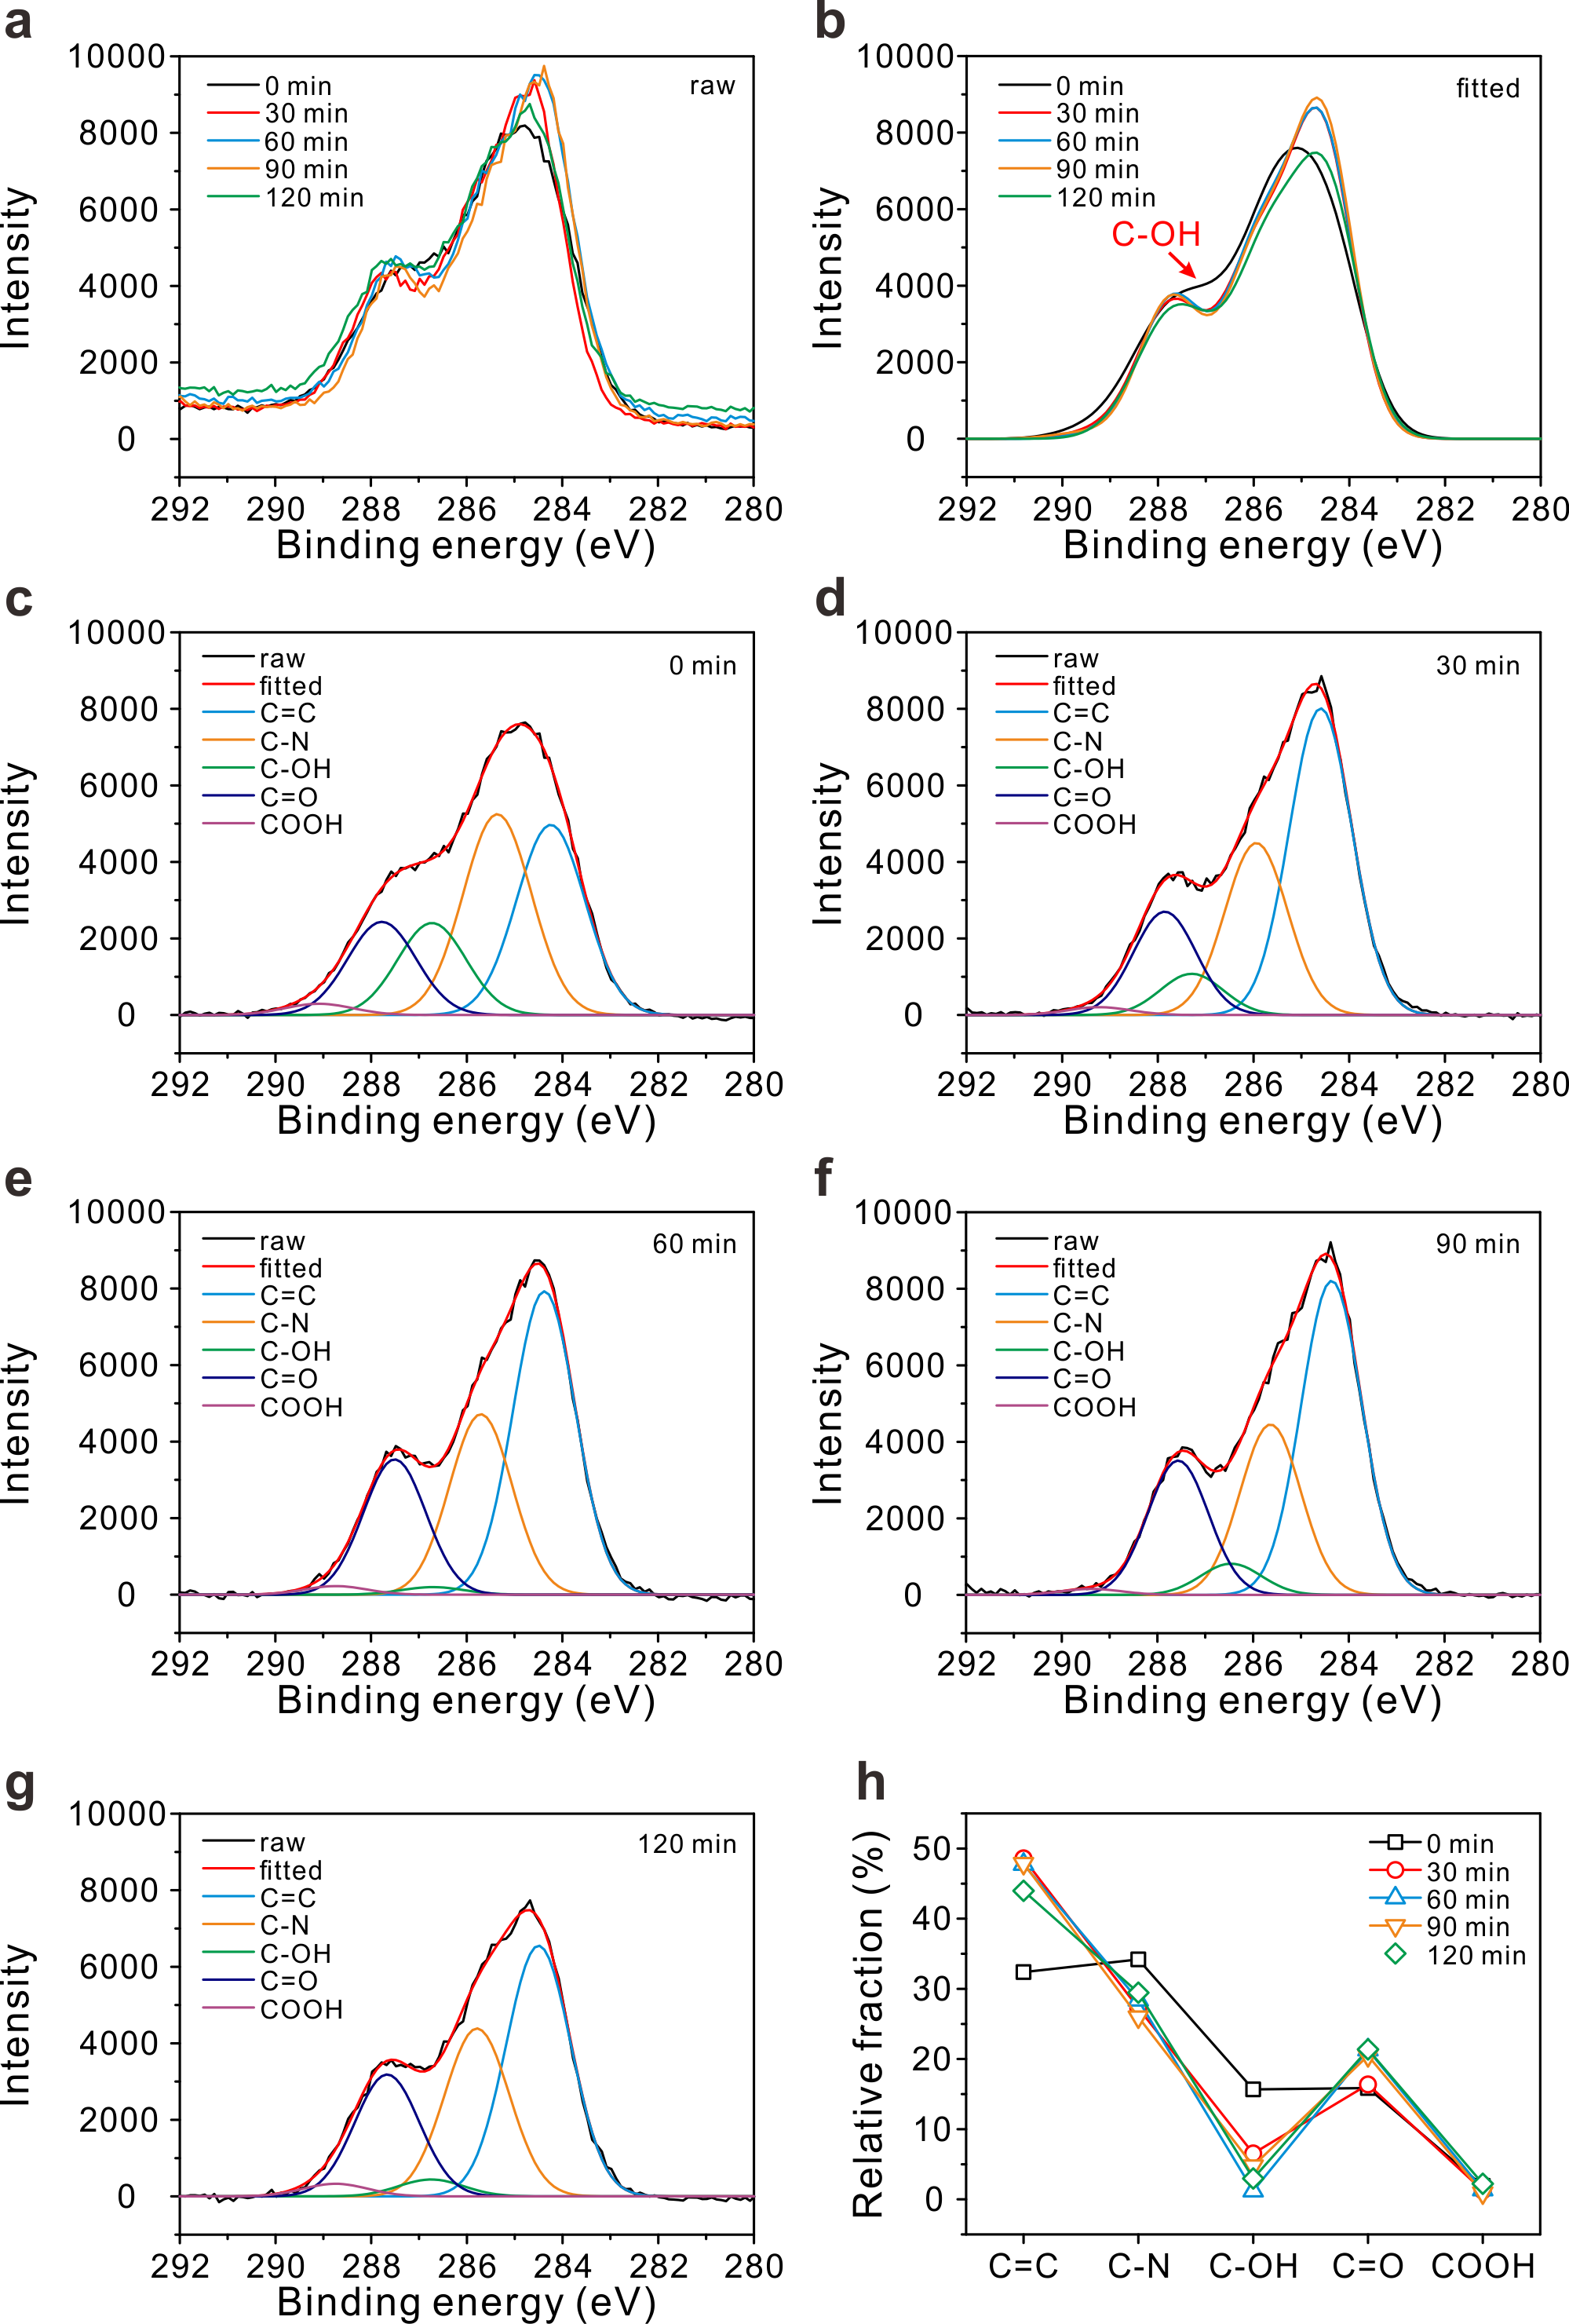


**Fig. S18**. (a) High-resolution XPS spectra and (b) fitted spectra of the C 1s peak of CD during the progress of the reaction. (c-g) Deconvoluted high-resolution XPS spectra of the C 1s peak of CD at (c) 0 min, (d) 30 min, (e) 60 min, (f) 90 min, and (g) 120 min with the sample used in Fig. 3d. (h) The changes in the chemical compositions of CD during the progress of the photochemical reactions.


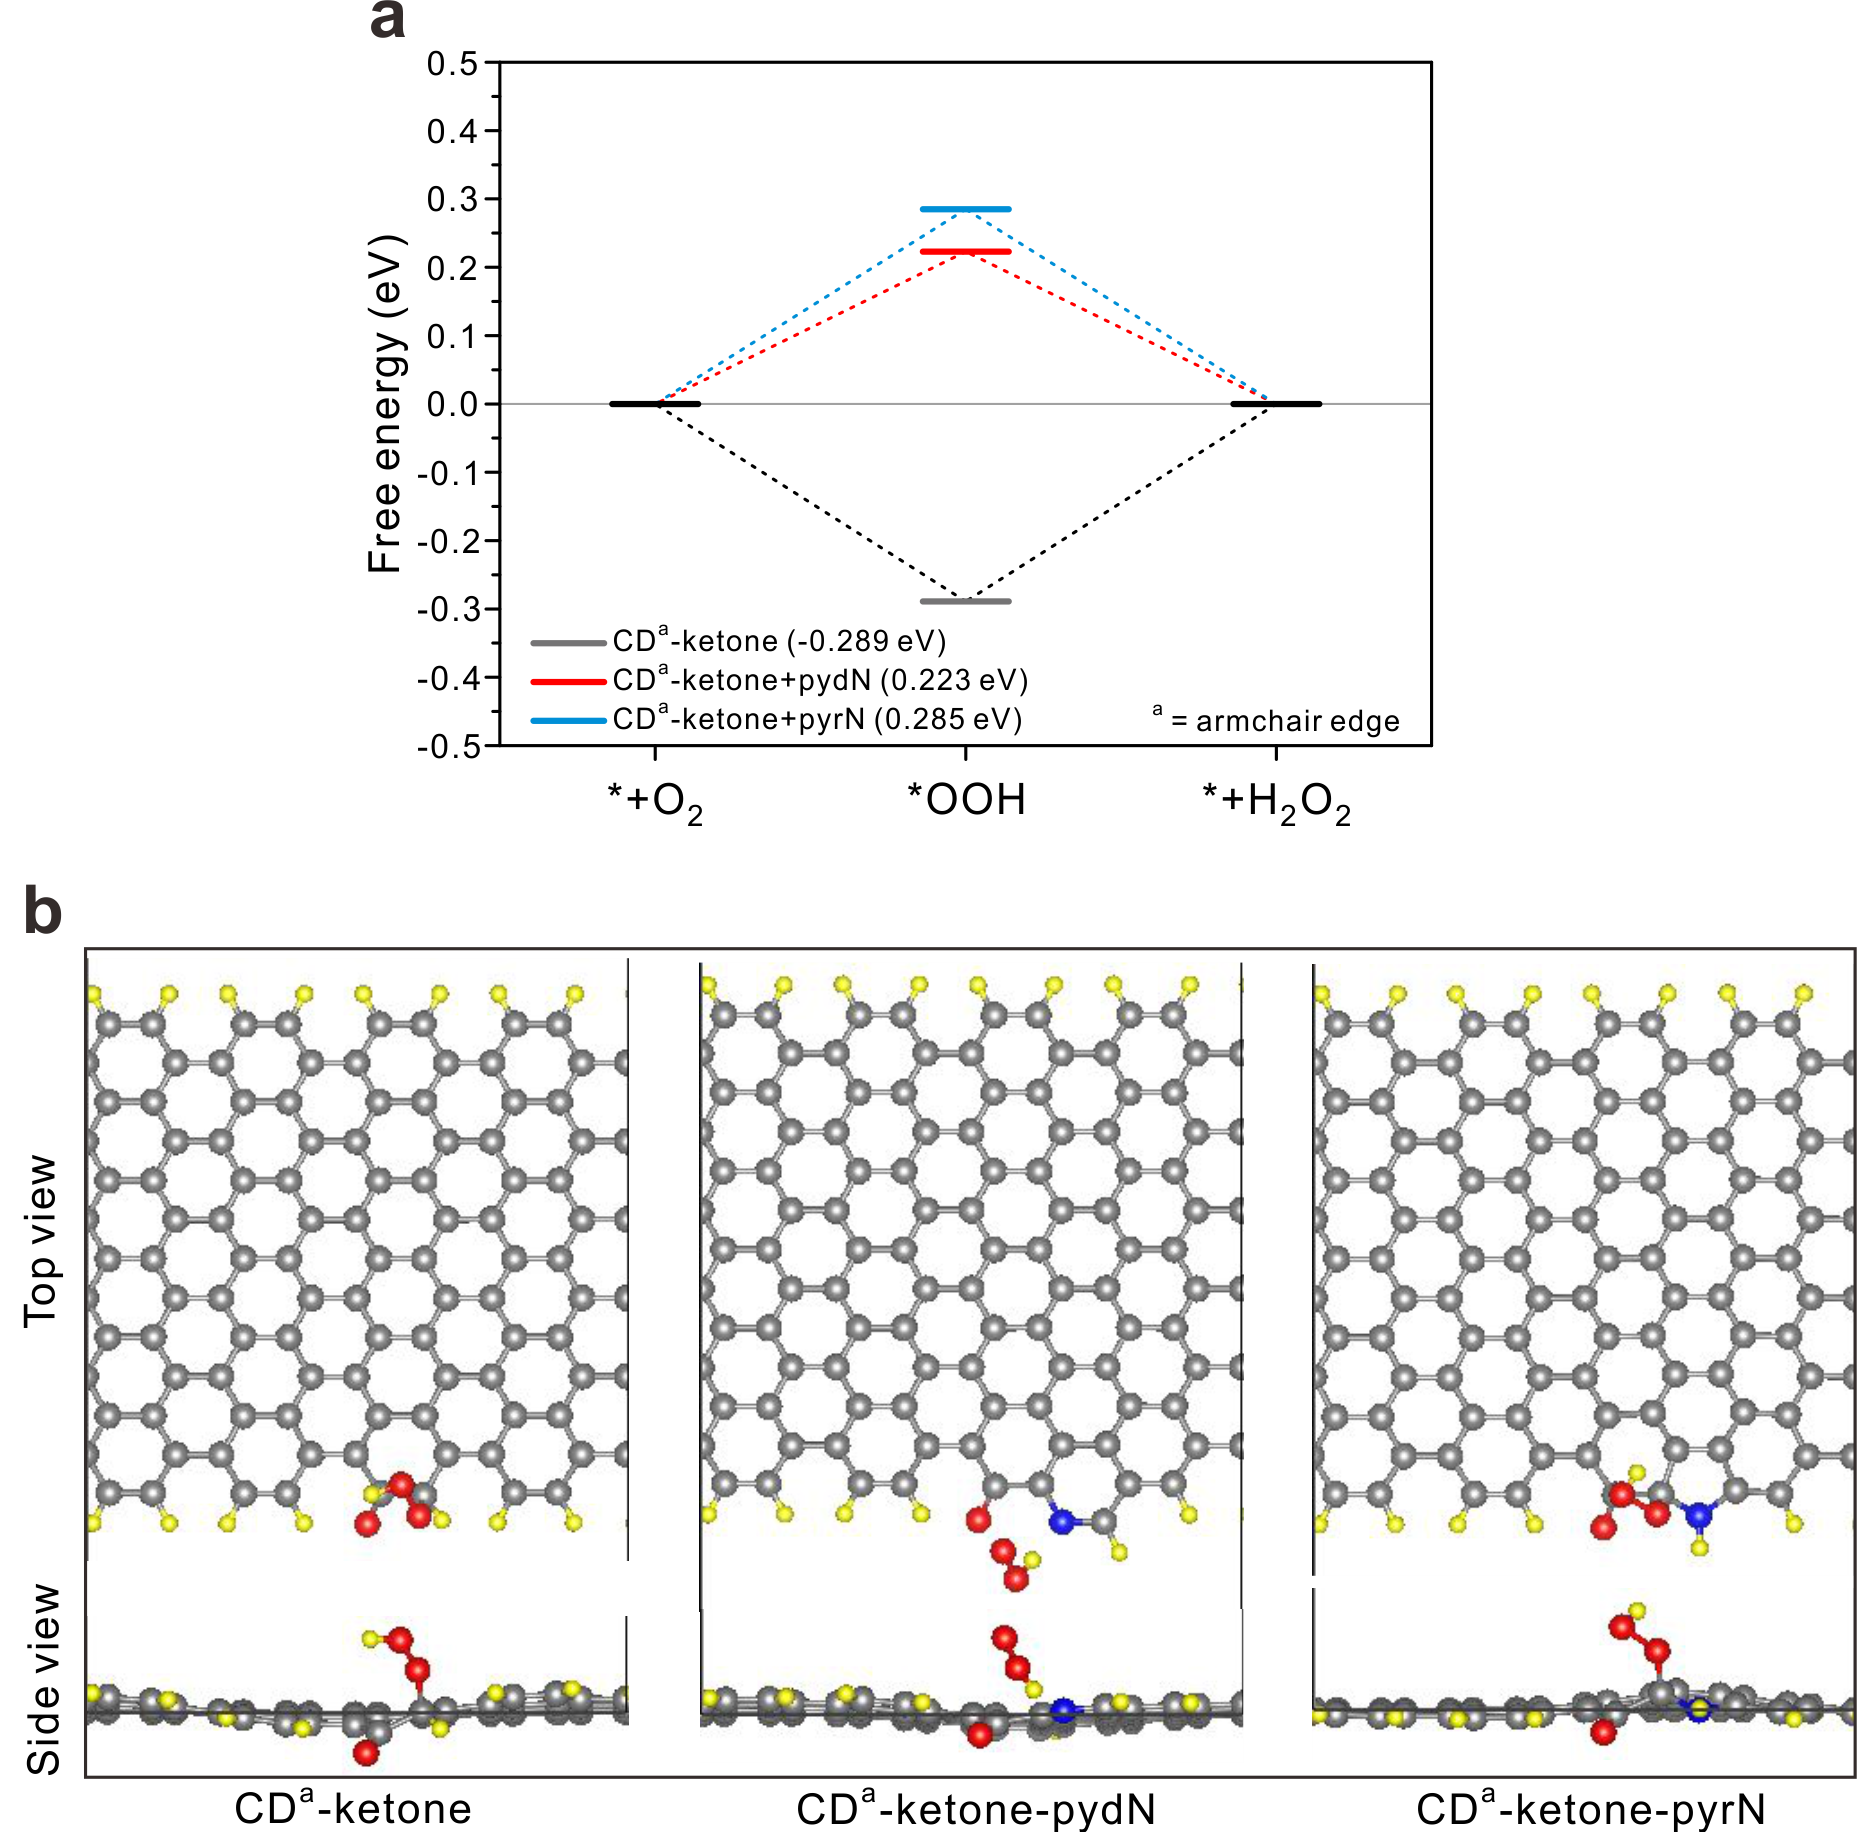


**Fig. S19** (a) Free-energy diagram for two-electron ORR and (b) the atomic structures of the examined oxygen (ketone) and nitrogen (pyridinic-N (pydN) and pyrrolic-N (pyrN)) functional groups (carbon (gray), oxygen (red), nitrogen (blue), and hydrogen (yellow)) of CDa-ketone, CDa-ketone-pydN, and CDa-ketone-pyrN. a denotes the armchair edges of CD.

**
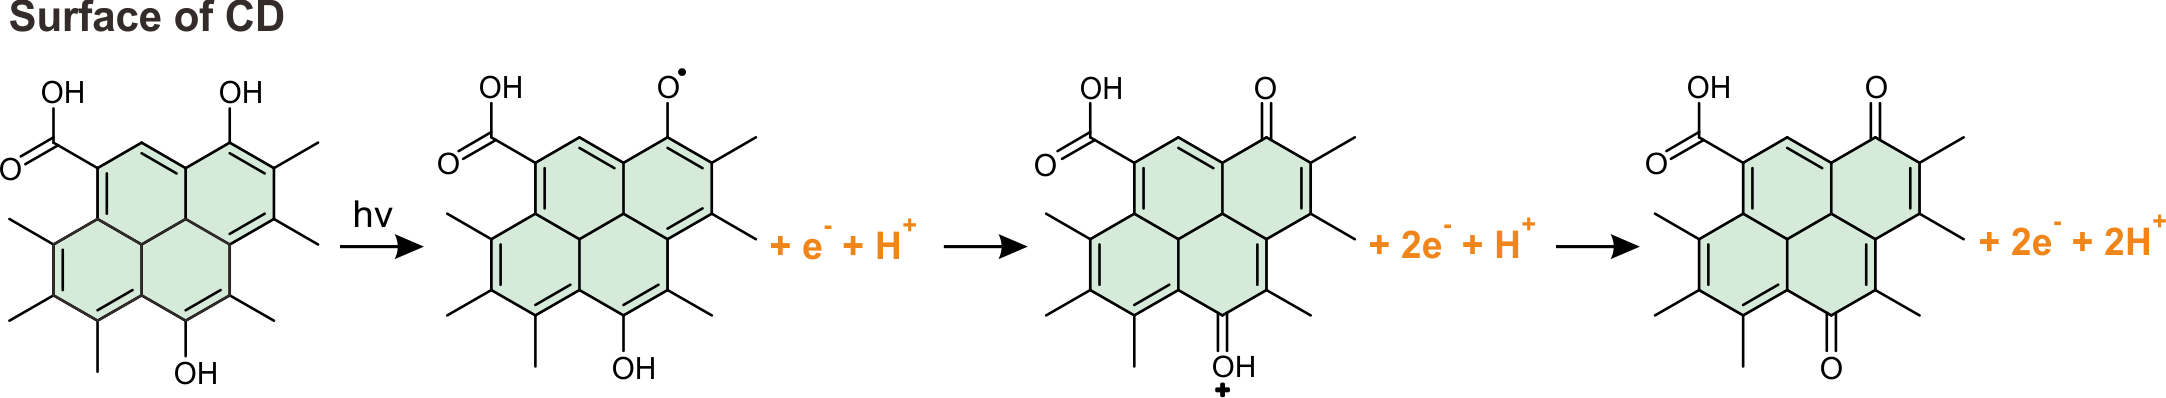
**

**Fig. S20** Proposed chemical mechanism involving the surface oxygen functional groups of carbon dots (CDs) as electron and proton donors upon photoexcitation.

**Reference**

S1. Shiraishi, Y. *et al.* Highly selective production of hydrogen peroxide on graphitic carbon nitride (g-C3N4) photocatalyst activated by visible light. *ACS Catal.* **4**, 774-780 (2014).

S2. Kim, H.-i., Choi, Y., Hu, S., Choi, W. & Kim, J.-H. Photocatalytic hydrogen peroxide production by anthraquinone-augmented polymeric carbon nitride. *Appl. Catal. B-Environ.* **229**, 121-129 (2018).

S3. Shi, L. et al. Photoassisted construction of holey defective g-C3N4 photocatalysts for efficient visible-light-driven H2O2 production. *Small* **14**, 1703142 (2018).

S4. Wei, Z. *et al.* Efficient visible-light-driven selective oxygen reduction to hydrogen peroxide by oxygen-enriched graphitic carbon nitride polymers. *Energy Environ. Sci.* **11**, 2581-2589 (2018).

S5. Kofuji, Y. *et al.* Hydrogen peroxide production on a carbon nitride–boron nitride-reduced graphene oxide hybrid photocatalyst under visible light. *ChemCatChem* **10**, 2070-2077 (2018).

S6. Kofuji, Y. *et al.* Carbon nitride–aromatic diimide–graphene nanohybrids: Metal-free photocatalysts for solar-to-hydrogen peroxide energy conversion with 0.2% efficiency. *J. Am. Chem. Soc.* **138**, 10019-10025 (2016).

S7. Zhu, Z., Pan, H., Murugananthan, M., Gong, J. & Zhang, Y. Visible light-driven photocatalytically active g-C3N4 material for enhanced generation of H2O2. *Appl. Catal. B-Environ.* **232**, 19-25 (2018).

S8. Teng, Z. *et al.* Bandgap engineering of polymetric carbon nitride copolymerized by 2,5,8-triamino-tri-s-triazine (melem) and barbituric acid for efficient nonsacrificial photocatalytic H2O2 production. *Appl. Catal. B-Environ.* **271**, 118917 (2020).

S9. Yang, L. *et al.* Two-channel photocatalytic production of H2O2 over g-C3N4 nanosheets modified with perylene imides. *J. Catal.* **352**, 274-281 (2017).

S10. Zeng, X. *et al.* Simultaneously tuning charge separation and oxygen reduction pathway on graphitic carbon nitride by polyethylenimine for boosted photocatalytic hydrogen peroxide production. *ACS Catal.* **10**, 3697-3706 (2020).
